# Supplementary material for: Horizontal gene transfer of zinc and non-zinc forms of bacterial ribosomal protein S4
Source: Springer Nature journal article supplement (doi:10.1186/1471-2148-9-179), 2009-07-29
Supplement: Additional file 1 [file 1471-2148-9-179-s1.pdf]

Table 1: Sequences used in the study<sup>a,b,c,d,e</sup>

| Taxon                                                    | S4            | S14            | S18                 | L28           | L31            | L32            | L33            | L36             |
|----------------------------------------------------------|---------------|----------------|---------------------|---------------|----------------|----------------|----------------|-----------------|
| <b>Bacteria (663)</b>                                    | <b>79/609</b> | <b>244/484</b> | <b>115/558</b>      | <b>99/566</b> | <b>316/426</b> | <b>188/373</b> | <b>158/539</b> | <b>416/175</b>  |
| <b>Acidobacteria (2)</b>                                 | 2/0           | 2/0            | 2/0                 | 2/0           | 2/0            | 2/0            | 2/0            | 2/0             |
| <b>Acidobacteria (class) (1)</b>                         | 1/0           | 1/0            | 1/0                 | 1/0           | 1/0            | 1/0            | 1/0            | 1/0             |
| Acidobacteria bacterium Ellin345                         | C+            | C+             | <sup>h</sup> C+     | C+            | C+             | C+             | C+             | <sup>h</sup> C+ |
| <b>Solibacteres (1)</b>                                  | C+            | C+             | 1/0                 | 1/0           | 1/0            | 1/0            | 1/0            | <sup>h</sup> C+ |
| Solibacter usitatus Ellin6076                            | C+            | C+             | <sup>h</sup> C+     | C+            | C+             | C+             | C+             | <sup>h</sup> C+ |
| <b>Actinobacteria (54)</b>                               | <b>6/50</b>   | <b>38/38</b>   | <b>31/42</b>        | <b>32/47</b>  | <b>37/34</b>   | <b>12/9</b>    | <b>36/41</b>   | <b>43/0</b>     |
| <b>Actinobacteria (class) (54)</b>                       | <b>6/50</b>   | <b>38/38</b>   | <b>31/42</b>        | <b>32/47</b>  | <b>37/34</b>   | <b>12/9</b>    | <b>36/41</b>   | <b>43/0</b>     |
| Actidothermus cellulolyticus 11B                         | C+            | C+             | <sup>h</sup> C+     | C+            | C+             | C+             | C+             | <sup>h</sup> C+ |
| Arthrobacter aureusens TC1                               | 4C-           | 4C-            | 4C-                 | 3C-           | 4C-            | 4C-            | 4C-            | <sup>h</sup> C+ |
| Arthrobacter sp. FB24                                    | 4C-           | 4C-            | 4C-                 | 3C-           | 4C-            | 4C-            | 4C-            | <sup>h</sup> C+ |
| Bifidobacterium adolescentis ATCC 15703                  | 4C-           | C+             | 4C-                 | C+            | C+             | C+             | C+             | <sup>h</sup> C+ |
| <b>Bifidobacterium longum</b>                            |               |                |                     |               |                |                |                |                 |
| Bifidobacterium longum DJO10A                            | 4C-           | C+             | 4C-                 | C+            | C+             | C+             | C+             | <sup>h</sup> C+ |
| Bifidobacterium longum NCC2705                           | 4C-           | C+             | 4C-                 | C+            | C+             | C+             | C+             | <sup>h</sup> C+ |
| <b>Clavibacter michiganensis</b>                         |               |                |                     |               |                |                |                |                 |
| Clavibacter michiganensis subsp. michiganensis NCPPB 382 | 4C-           | 4C-            | 4C-                 | 3C-           | 4C-            | 4C-            | 4C-            | <sup>h</sup> C+ |
| Clavibacter michiganensis subsp. sepedonicus             | 4C-           | 4C-            | 4C-                 | 3C-           | 4C-            | 4C-            | 4C-            | <sup>h</sup> C+ |
| Corynebacterium diphtheriae NCTC 13129                   | 4C-           | 4C-            | 4C-                 | 3C-           | 4C-            | 4C-            | 4C-            | <sup>h</sup> C+ |
| Corynebacterium efficiens YS-314                         | 4C-           | 4C-            | 4C-                 | 3C-           | 4C-            | 4C-            | 4C-            | <sup>h</sup> C+ |
| <b>Corynebacterium glutamicum</b>                        |               |                |                     |               |                |                |                |                 |
| Corynebacterium glutamicum ATCC 13032                    | 4C-           | 4C-/4C-        | 4C-/4C-             | 3C-/3C-       | 4C-/4C-        | 4C-/4C-        | 4C-/4C-        | <sup>h</sup> C+ |
| Corynebacterium glutamicum ATCC 13032 Bielefeld          | 4C-           | 4C-            | 4C-                 | 3C-           | 4C-            | 4C-            | 4C-            | <sup>h</sup> C+ |
| Corynebacterium glutamicum ATCC 13032 Kitasato           | 4C-           | 4C-            | 4C-                 | 3C-           | 4C-            | 4C-            | 4C-            | <sup>h</sup> C+ |
| Corynebacterium glutamicum R                             | 4C-           | 4C-            | 4C-                 | 3C-           | 4C-            | 4C-            | 4C-            | <sup>h</sup> C+ |
| Corynebacterium jeikeium K411                            | C+            | C+             | <sup>h</sup> C+/4C- | C+            | C+             | C+             | C+             | <sup>h</sup> C+ |
| Corynebacterium urealyticum DSM 7109                     | C+            | C+             | <sup>h</sup> C+     | C+            | C+             | C+             | C+             | <sup>h</sup> C+ |
| Frankia alni ACN14a                                      | C+/4C-        | C+             | <sup>h</sup> C+     | C+            | C+             | C+             | C+             | <sup>h</sup> C+ |
| Frankia sp. CcI3                                         | 4C-           | C+/4C-         | 4C-                 | C+/3C-        | C+             | C+             | C+/4C-         | <sup>h</sup> C+ |
| Frankia sp. EAN1pec                                      | 4C-           | 4C-            | 4C-                 | 3C-           | 4C-            | 4C-            | 4C-            | <sup>h</sup> C+ |
| Kineococcus radiotolerans SRS30216                       | 4C-           | C+/4C-         | <sup>h</sup> C+/4C- | C+/3C-        | C+/4C-         | 4C-            | C+/4C-         | <sup>h</sup> C+ |
| Leifsonia xyli subsp. xyli str. CTCB07                   | 4C-           | 4C-            | 4C-                 | 3C-           | 4C-            | 4C-            | 4C-            | <sup>h</sup> C+ |
| Mycobacterium abscessus                                  | 4C-           | C+/4C-         | <sup>h</sup> C+/4C- | C+/3C-        | C+/4C-         | 4C-            | C+/4C-         | <sup>h</sup> C+ |
| <b>Mycobacterium avium</b>                               |               |                |                     |               |                |                |                |                 |
| Mycobacterium avium 104                                  | 4C-           | C+             | <sup>h</sup> C+     | C+/3C-        | C+             | C+             | C+/4C-         | <sup>h</sup> C+ |
| Mycobacterium avium subsp. paratuberculosis K-10         | 4C-           | C+/4C-         | <sup>h</sup> C+/4C- | C+/3C-        | C+/4C-         | 4C-            | C+/4C-         | <sup>h</sup> C+ |
| <b>Mycobacterium bovis</b>                               |               |                |                     |               |                |                |                |                 |
| Mycobacterium bovis AF2122/97                            | 4C-           | C+/4C-         | <sup>h</sup> C+/4C- | 3C-/3C-       | C+             | C+             | C+             | <sup>h</sup> C+ |
| Mycobacterium bovis BCG str. Pasteur 1173P2              | 4C-           | C+/4C-         | <sup>h</sup> C+/4C- | 3C-/3C-       | C+             | C+             | C+             | <sup>h</sup> C+ |
| Mycobacterium gilvum PYR-GCK                             | 4C-           | C+/4C-         | <sup>h</sup> C+/4C- | C+/3C-        | C+             | C+             | C+/4C-         | <sup>h</sup> C+ |
| Mycobacterium leprae TN                                  | 4C-           | C+             | <sup>h</sup> C+     | C+/3C-        | C+             | C+             | C+             | <sup>h</sup> C+ |
| Mycobacterium marinum M                                  | 4C-           | C+/4C-         | <sup>h</sup> C+/4C- | C+/3C-        | C+/4C-         | C+/4C-         | C+/4C-         | <sup>h</sup> C+ |
| Mycobacterium smegmatis str. MC2 155                     | 4C-           | C+             | <sup>h</sup> C+     | C+/3C-        | C+/4C-         | C+/4C-         | C+/4C-         | <sup>h</sup> C+ |
| Mycobacterium sp. JLS                                    | 4C-           | C+             | <sup>h</sup> C+     | C+/3C-        | C+             | C+             | C+/4C-         | <sup>h</sup> C+ |
| Mycobacterium sp. KMS                                    | 4C-           | C+             | <sup>h</sup> C+     | C+/3C-        | C+             | C+             | C+/4C-         | <sup>h</sup> C+ |
| Mycobacterium sp. MCS                                    | 4C-           | C+             | <sup>h</sup> C+     | C+/3C-        | C+             | C+             | C+/4C-         | <sup>h</sup> C+ |

Table 1: (cont) Sequences used in the study

| Taxon                                          | S4                  | S14                 | S18                              | L28                                     | L31                 | L32 | L33                  | L36             |
|------------------------------------------------|---------------------|---------------------|----------------------------------|-----------------------------------------|---------------------|-----|----------------------|-----------------|
| <b>Mycobacterium tuberculosis</b>              |                     |                     |                                  |                                         |                     |     |                      |                 |
| Mycobacterium tuberculosis CDC1551             | 4C-                 | C+/ <sup>A</sup> C- | <sup>h</sup> C+/ <sup>h</sup> C- | C+/ <sup>β</sup> C-/<br><sup>β</sup> C- | C+                  |     | C+                   | <sup>h</sup> C+ |
| Mycobacterium tuberculosis F11                 | 4C-                 | C+/ <sup>A</sup> C- | <sup>h</sup> C+/ <sup>h</sup> C- | <sup>β</sup> C-/<br><sup>β</sup> C-     | C+                  |     | C+                   | <sup>h</sup> C+ |
| Mycobacterium tuberculosis H37Ra               | 4C-                 | C+/ <sup>A</sup> C- | <sup>h</sup> C+/ <sup>h</sup> C- | <sup>β</sup> C-/<br><sup>β</sup> C-     | C+                  |     | C+                   | <sup>h</sup> C+ |
| Mycobacterium tuberculosis H37Rv               | 4C-                 | C+/ <sup>A</sup> C- | <sup>h</sup> C+/ <sup>h</sup> C- | <sup>β</sup> C-/<br><sup>β</sup> C-     | C+                  |     | C+                   | <sup>h</sup> C+ |
| Mycobacterium ulcerans Agy99                   | 4C-                 | C+/ <sup>A</sup> C- | <sup>h</sup> C+/ <sup>h</sup> C- | C+/ <sup>β</sup> C-                     | C+/ <sup>A</sup> C- |     | C+/ <sup>A</sup> C-  | <sup>h</sup> C+ |
| Mycobacterium vanbaalenii PYR-1                | 4C-                 | C+/ <sup>A</sup> C- | <sup>h</sup> C+/ <sup>h</sup> C- | C+/ <sup>β</sup> C-                     | C+/ <sup>A</sup> C- |     | C+/ <sup>A</sup> C-  | <sup>h</sup> C+ |
| Nocardia farcinica IFM 10152                   | 4C-                 | C+/ <sup>A</sup> C- | <sup>h</sup> C+/ <sup>h</sup> C- | C+/ <sup>β</sup> C-                     | C+/ <sup>A</sup> C- |     | C+/ <sup>A</sup> C-  | <sup>h</sup> C+ |
| Nocardioides sp. JS614                         | 4C-                 | C+                  | <sup>h</sup> C+                  | C+                                      | C+                  |     | C+                   | <sup>h</sup> C+ |
| Propionibacterium acnes KPA171202              | 4C-                 | C+/ <sup>A</sup> C- | 4C-                              | <sup>β</sup> C-                         | C+/ <sup>A</sup> C- |     | C+/ <sup>A</sup> C-  | <sup>h</sup> C+ |
| Renibacterium salmoninarum ATCC 33209          | 4C-                 | 4C-                 | 4C-                              | <sup>β</sup> C-                         | 4C-                 | 4C- | 4C-                  | <sup>h</sup> C+ |
| Rhodococcus sp. RHAI                           | 4C-                 | C+/ <sup>A</sup> C- | <sup>h</sup> C+/ <sup>h</sup> C- | C+/ <sup>β</sup> C-                     | C+/ <sup>A</sup> C- |     | C+/ <sup>A</sup> C-  | <sup>h</sup> C+ |
| Rubrobacter xylanophilus DSM 9941              | 4C-                 | C+                  | <sup>h</sup> C+                  | C+                                      | C+                  |     | C+                   | <sup>h</sup> C+ |
| Saccharopolyspora erythraea NRRRL 2338         | 4C-                 | C+/ <sup>A</sup> C- | <sup>h</sup> C+/ <sup>h</sup> C- | C+/ <sup>β</sup> C-                     | C+/ <sup>A</sup> C- |     | C+/ <sup>A</sup> C-  | <sup>h</sup> C+ |
| Salinispora arenicola CNS-205                  | C+/ <sup>A</sup> C- | C+/ <sup>A</sup> C- | 4C-                              | C+/ <sup>β</sup> C-                     | C+/ <sup>A</sup> C- |     | 1C+/ <sup>A</sup> C- | <sup>h</sup> C+ |
| Salinispora tropica CNB-440                    | C+/ <sup>A</sup> C- | C+/ <sup>A</sup> C- | 4C-                              | C+/ <sup>β</sup> C-                     | C+/ <sup>A</sup> C- |     | 4C-/1C-              | <sup>h</sup> C+ |
| Streptomyces avermitilis MA-4680               | 4C-                 | C+/ <sup>A</sup> C- | <sup>h</sup> C+/ <sup>h</sup> C- | C+/ <sup>A</sup> C-                     | C+/ <sup>A</sup> C- |     | C+/ <sup>A</sup> C-  | <sup>h</sup> C+ |
| Streptomyces coelicolor A3(2)                  | 4C-                 | C+/ <sup>A</sup> C- | <sup>h</sup> C+/ <sup>h</sup> C- | C+/ <sup>β</sup> C-                     | C+/ <sup>A</sup> C- |     | C+/ <sup>A</sup> C-  | <sup>h</sup> C+ |
| Streptomyces griseus subsp. griseus NBRC 13350 | 4C-                 | C+/ <sup>A</sup> C- | <sup>h</sup> C+/ <sup>h</sup> C- | C+/ <sup>β</sup> C-                     | C+/ <sup>A</sup> C- |     | C+/ <sup>A</sup> C-  | <sup>h</sup> C+ |
| Thermobifida fusca YX                          | 4C-                 | C+                  | <sup>h</sup> C+                  | C+                                      | C+                  |     | C+                   | <sup>h</sup> C+ |
| <b>Tropheryma whipplei</b>                     |                     |                     |                                  |                                         |                     |     |                      |                 |
| Tropheryma whipplei TW08/27                    | 4C-                 | 4C-                 | 4C-                              | <sup>β</sup> C-                         | 4C-                 | 4C- | 4C-                  | <sup>h</sup> C+ |
| Tropheryma whipplei str. Twist                 | 4C-                 | 4C-                 | 4C-                              | <sup>β</sup> C-                         | 4C-                 | 4C- | 4C-                  | <sup>h</sup> C+ |
| <b>Aquificae (2)</b>                           | 0/2                 | 2/0                 | 2/0                              | 2/0                                     | 2/0                 | 2/0 | 2/0                  | 2/0             |
| <b>Aquificae (class) (2)</b>                   | 0/2                 | 2/0                 | 2/0                              | 2/0                                     | 2/0                 | 2/0 | 2/0                  | 2/0             |
| Aquifex aeolicus VF5                           | 4C-                 | C+                  | <sup>h</sup> C+                  | <sup>s</sup> C+                         | C+                  | C+  | C+                   | <sup>h</sup> C+ |
| Sulfurithydrogenibium sp. YO3AOP1              | 4C-                 | C+                  | <sup>h</sup> C+                  | C+                                      | C+                  | C+  | C+                   | <sup>h</sup> C+ |
| <b>Bacteroidetes (13)</b>                      | 0/13                | 1/12                | 0/13                             | 0/13                                    | 0/13                | 6/4 | 0/10                 | 0/7             |
| <b>Bacteroidetes (class) (7)</b>               | 0/7                 | 0/7                 | 0/7                              | 0/7                                     | 0/7                 | 4/0 | 0/5                  | 0/4             |
| <b>Bacteroides fragilis</b>                    |                     |                     |                                  |                                         |                     |     |                      |                 |
| Bacteroides fragilis NCTC 9343                 | 4C-                 | 3C-                 | 3C-                              | 2C-                                     | 4C-                 |     | 3C-                  | 3C-             |
| Bacteroides fragilis YCH46                     | 4C-                 | 3C-                 | 3C-                              | 2C-                                     | 4C-                 | C+  | 3C-                  | 3C-             |
| Bacteroides thetaiotaomicron VPI-5482          | 4C-                 | 3C-                 | 3C-                              | 2C-                                     | 4C-                 | C+  | 3C-                  | 3C-             |
| Bacteroides vulgatus ATCC 8482                 | 4C-                 | 3C-                 | 3C-                              | 2C-                                     | 4C-                 | C+  | 3C-                  | 3C-             |
| Parabacteroides distasonis ATCC 8503           | 4C-                 | 3C-                 | 3C-                              | 3C-                                     | 4C-                 |     | 3C-                  | 3C-             |
| <b>Porphyromonas gingivalis</b>                |                     |                     |                                  |                                         |                     |     |                      |                 |
| Porphyromonas gingivalis ATCC 33277            | 4C-                 | 3C-                 | 3C-                              | 3C-                                     | 4C-                 | C+  | 3C-                  | 3C-             |
| Porphyromonas gingivalis W83                   | 4C-                 | 3C-                 | 3C-                              | 3C-                                     | 4C-                 | C+  | 3C-                  | 3C-             |
| <b>Flavobacteria (4)</b>                       | 0/4                 | 0/4                 | 0/4                              | 0/4                                     | 0/4                 | 0/4 | 0/4                  | 0/3             |
| Candidatus Sulcia muelleri GWSS                | 4C-                 | 3C-                 | 3C-                              | 3C-                                     | 4C-                 | 4C- | 3C-                  | 3C-             |
| Flavobacterium johnsoniae UW101                | 4C-                 | 3C-                 | 3C-                              | 3C-                                     | 4C-                 | 3C- | 3C-                  | 3C-             |
| Flavobacterium psychrophilum JIP02/86          | 4C-                 | 3C-                 | 3C-                              | 3C-                                     | 4C-                 | 3C- | 3C-                  | 3C-             |
| Gramella forsetii KT0803                       | 4C-                 | 3C-                 | 3C-                              | 2C-                                     | 4C-                 | 4C- | 3C-                  | 3C-             |
| <b>Sphingobacteria (2)</b>                     | 0/2                 | 1/1                 | 0/2                              | 0/2                                     | 0/2                 | 2/0 | 0/1                  | 0/0             |
| Cytophaga hutchinsonii ATCC 33406              | 4C-                 | 3C-                 | 3C-                              | 3C-                                     | 4C-                 | C+  | 3C-                  | 3C-             |
| Salinibacter ruber DSM 13855                   | 4C-                 | C+                  | 4C-                              | 4C-                                     | 4C-                 | C+  | 3C-                  | 3C-             |



Table 1: (cont) Sequences used in the study

| Taxon                                                 | S4  | S14                 | S18 | L28                 | L31                 | L32 | L33                                  | L36         |
|-------------------------------------------------------|-----|---------------------|-----|---------------------|---------------------|-----|--------------------------------------|-------------|
| <b>Prochlorococcus marinus</b>                        |     |                     |     |                     |                     |     |                                      |             |
| Prochlorococcus marinus str. AS9601                   | 4C- | 2C-                 | 4C- | 3C-                 | 4C-                 | 4C- | 1C-                                  | <i>h</i> C+ |
| Prochlorococcus marinus str. MIT 9211                 | 4C- | 2C-                 | 4C- | 3C-                 | 4C-                 | 4C- |                                      |             |
| Prochlorococcus marinus str. MIT 9215                 | 4C- | 2C-                 | 4C- | 3C-                 | 4C-                 | 4C- |                                      |             |
| Prochlorococcus marinus str. MIT 9301                 | 4C- | 2C-                 | 4C- | 3C-                 | 4C-                 | 4C- | C+                                   | <i>h</i> C+ |
| Prochlorococcus marinus str. MIT 9303                 | 4C- | 2C-                 | 4C- | 3C-                 | 4C-                 | 4C- | C+                                   | 4C-         |
| Prochlorococcus marinus str. MIT 9312                 | 4C- | 2C-                 | 4C- | 3C-                 | 4C-                 | 4C- | C+                                   | <i>h</i> C+ |
| Prochlorococcus marinus str. MIT 9313                 | 4C- | 2C-                 | 4C- | 3C-                 | 4C-                 | 4C- | C+                                   | 4C-         |
| Prochlorococcus marinus str. MIT 9515                 | 4C- | 2C-                 | 4C- | 3C-                 | 4C-                 | 4C- | 2C-                                  | <i>h</i> C+ |
| Prochlorococcus marinus str. NATL1A                   | 4C- | 2C-                 | 4C- | 3C-                 | 4C-                 | 4C- | 1C-                                  | <i>h</i> C+ |
| Prochlorococcus marinus str. NATL2A                   | 4C- | 2C-                 | 4C- | 3C-                 | 4C-                 | 4C- | 1C-                                  | <i>h</i> C+ |
| Prochlorococcus marinus subsp. marinus str. CCMP1375  | 4C- | 2C-                 | 4C- | 3C-                 | 4C-                 | 4C- |                                      | 4C-         |
| Prochlorococcus marinus subsp. pastoris str. CCMP1986 | 4C- | 2C-                 | 4C- | 3C-                 | 4C-                 | 4C- |                                      | <i>h</i> C+ |
| <b>Synechococcus elongatus</b>                        |     |                     |     |                     |                     |     |                                      |             |
| Synechococcus elongatus PCC 6301                      | 4C- | 2C-                 | 4C- | 3C-                 | 4C-                 | 4C- | C+                                   | <i>h</i> C+ |
| Synechococcus elongatus PCC 7942                      | 4C- | 2C-                 | 4C- | 3C-                 | 4C-                 | 4C- | C+                                   | <i>h</i> C+ |
| Synechococcus sp. CC9311                              | 4C- | 2C-                 | 4C- | 3C-                 | 4C-                 | 4C- | 1C-                                  | <i>h</i> C+ |
| Synechococcus sp. CC9605                              | 4C- | 2C-                 | 4C- | 3C-                 | 4C-                 | 4C- | C+ <sup>1</sup> C-                   | <i>h</i> C+ |
| Synechococcus sp. CC9902                              | 4C- | 2C-                 | 4C- | 3C-                 | 4C-                 | 4C- | 1C-                                  | <i>h</i> C+ |
| Synechococcus sp. JA-2-3B <sup>a</sup> (2-13)         | 4C- | 2C-                 | 4C- | 3C-                 | 4C-                 | 4C- |                                      | <i>h</i> C+ |
| Synechococcus sp. JA-3-3Ab                            | 4C- | 2C-                 | 4C- | 3C-                 | 4C-                 | 4C- | C+                                   | <i>h</i> C+ |
| Synechococcus sp. PCC 7002                            | 4C- | 2C-                 | 4C- | 3C-                 | 4C-                 | 4C- | 1C-                                  | <i>h</i> C+ |
| Synechococcus sp. RCC307                              | 4C- | 2C-                 | 4C- | 3C-                 | 4C-                 | 4C- | C+                                   | <i>h</i> C+ |
| Synechococcus sp. WH 7803                             | 4C- | 2C-                 | 4C- | 3C-                 | 4C-                 | 4C- | 1C-                                  | <i>h</i> C+ |
| Synechococcus sp. WH 8102                             | 4C- | 2C-                 | 4C- | 3C-                 | 4C-                 | 4C- | 1C-                                  | <i>h</i> C+ |
| Synechocystis sp. PCC 6803                            | 4C- | 2C-                 | 4C- | 3C-                 | 4C-                 | 4C- | C+                                   | <i>h</i> C+ |
| Thermosynechococcus elongatus BP-1                    | 4C- | 2C-                 | 4C- | 3C-                 | 4C-                 | 4C- | C+                                   | <i>h</i> C+ |
| Trichodesmium erythraeum IMS101                       | 4C- | 3C-                 | 4C- | 3C-                 | 4C-                 | 4C- | C+                                   | <i>h</i> C+ |
| <b>Deinococcus-Thermus (4)</b>                        |     |                     |     |                     |                     |     |                                      |             |
| <b>Deinococi (4)</b>                                  | 2/2 | 3/1                 | 0/4 | 1/4                 | 2/2                 | 4/0 | 2/2                                  | 4/0         |
| Deinococcus geothermalis DSM 11300                    | 2/2 | 3/1                 | 0/4 | 1/4                 | 2/2                 | 4/0 | 2/2                                  | 4/0         |
| Deinococcus radiodurans R1                            | 4C- | C+                  | 4C- | C+/ <sup>3</sup> C- | 4C-                 | C+  | 4C-                                  | <i>h</i> C+ |
| 4C-                                                   | 4C- | 4C-                 | 3C- | 3C-                 | 4C-                 | C+  | 4C-                                  | <i>h</i> C+ |
| <b>Thermus thermophilus</b>                           |     |                     |     |                     |                     |     |                                      |             |
| Thermus thermophilus HB27                             | C+  | C+                  | 4C- | 3C-                 | C+                  | C+  | C+                                   | <i>h</i> C+ |
| Thermus thermophilus HB8                              | C+  | C+                  | 4C- | 3C-                 | C+                  | C+  | C+                                   | <i>h</i> C+ |
| <b>Firmicutes (127)</b>                               |     |                     |     |                     |                     |     |                                      |             |
| <b>Bacilli (93)</b>                                   |     |                     |     |                     |                     |     |                                      |             |
| Bacillus amyloliquefaciens FZB42                      | 4C- | C+/ <sup>3</sup> C- | 3C- | 3C-                 | C+/ <sup>4</sup> C- | C+  | C+/ <sup>1</sup> C-/ <sup>3</sup> C- | <i>h</i> C+ |
| <b>Bacillus anthracis</b>                             |     |                     |     |                     |                     |     |                                      |             |
| Bacillus anthracis str. 'Ames Ancestor'               | 4C- | C+                  | 3C- | 3C-                 | 4C-                 | C+  | 1C-/ <sup>1</sup> C-                 | <i>h</i> C+ |
| Bacillus anthracis str. Ames                          | 4C- | C+                  | 3C- | 3C-                 | 4C-                 | C+  | 1C-/ <sup>1</sup> C-                 | <i>h</i> C+ |
| Bacillus anthracis str. Sterne                        | 4C- | C+                  | 3C- | 3C-                 | 4C-                 | C+  | 1C-/ <sup>1</sup> C-                 | <i>h</i> C+ |
| <b>Bacillus cereus</b>                                |     |                     |     |                     |                     |     |                                      |             |
| Bacillus cereus ATCC 10987                            | 4C- | C+                  | 3C- | 3C-                 | 4C-                 | C+  | 1C-/ <sup>1</sup> C-                 | <i>h</i> C+ |
| Bacillus cereus ATCC 14579                            | 4C- | C+                  | 3C- | 3C-                 | 4C-                 | C+  | 1C-/ <sup>1</sup> C-                 | <i>h</i> C+ |
| Bacillus cereus E33L                                  | 4C- | C+                  | 3C- | 3C-                 | 4C-                 | C+  |                                      |             |

Table 1: (cont) Sequences used in the study

| Taxon                                                           | S4  | S14                                 | S18                         | L28             | L31                           | L32            | L33                                   | L36     |
|-----------------------------------------------------------------|-----|-------------------------------------|-----------------------------|-----------------|-------------------------------|----------------|---------------------------------------|---------|
| <i>Bacillus cereus</i> subsp. cytotoxis NVH 391-98              | 4C- | C+                                  | 3C-                         | 3C-             | 4C-                           | C+             | 1C-/1C-                               | hC+     |
| <i>Bacillus clausii</i> KSM-K16                                 | 4C- | C+/ $\beta$ C-                      | 3C-                         | 3C-             | 4C-                           | C+             | 3C-                                   | hC+     |
| <i>Bacillus halodurans</i> C-125                                | 4C- | C+                                  | 3C-                         | 3C-             | 4C-                           | C+             | C+                                    | hC+     |
| <b>Bacillus licheniformis</b>                                   |     |                                     |                             |                 |                               |                |                                       |         |
| <i>Bacillus licheniformis</i> ATCC 14580                        | 4C- | C+/C+/C+/C+/ $\beta$ C-/ $\beta$ C- | 3C-/ $\beta$ C-/ $\beta$ C- | 3C-/ $\beta$ C- | C+/C+/ $\beta$ C-/ $\beta$ C- | C+/C+          | C+/C+/1C-/ $\beta$ C-/1C-/ $\beta$ C- | hC+/hC+ |
| <i>Bacillus licheniformis</i> DSM 13                            | 4C- |                                     |                             |                 |                               |                |                                       |         |
| <i>Bacillus pumilus</i> SAFR-032                                | 4C- | C+/ $\beta$ C-                      | 3C-                         | 3C-             | C+/ $\beta$ C-                | C+             | C+/ $\beta$ C-/ $\beta$ C-            | hC+     |
| <i>Bacillus subtilis</i> subsp. subtilis str. 168               | 4C- | C+/ $\beta$ C-                      | 3C-                         | 3C-             | C+/ $\beta$ C-                | C+             | C+/1C-                                | hC+     |
| <b>Bacillus thuringiensis</b>                                   |     |                                     |                             |                 |                               |                |                                       |         |
| <i>Bacillus thuringiensis</i> serovar konkukian str. 97-27      | 4C- | C+                                  | 3C-                         | 3C-             | 4C-                           | C+             |                                       |         |
| <i>Bacillus thuringiensis</i> str. AI Hakam                     | 4C- | C+                                  | 3C-                         | 3C-             | 4C-                           | C+             |                                       |         |
| <i>Bacillus weihenstephanensis</i> KBAB4                        | 4C- | C+                                  | 3C-                         | 3C-             | 4C-                           | C+             | 1C-                                   | hC+     |
| <i>Enterococcus faecalis</i> V583                               | 4C- | C+/ $\beta$ C-/ $\beta$ C-          | 4C-                         | 3C-             | 4C-                           | C+/ $\beta$ C- | 1C-/ $\beta$ C-                       | hC+     |
| <i>Exiguobacterium sibiricum</i> 255-15                         | 4C- | 3C-                                 | 3C-                         | 3C-             | 4C-                           | C+             | C+/ $\beta$ C-                        | hC+     |
| <i>Geobacillus kaustophilus</i> HTA426                          | 4C- | C+                                  | 3C-                         | 3C-             | C+                            | C+             | C+/1C-                                | hC+     |
| <i>Geobacillus thermodenitrificans</i> NG80-2                   | 4C- | C+                                  | 3C-                         | 3C-             | C+                            | C+             | C+/1C-                                | hC+     |
| <i>Lactobacillus acidophilus</i> NCFM                           | 4C- | 4C-                                 | 4C-                         | 4C-             | 4C-                           | 4C-            | 1C-                                   | hC+     |
| <i>Lactobacillus brevis</i> ATCC 367                            | 4C- | C+/ $\beta$ C-                      | 4C-                         | 4C-             | 4C-                           | C+             | C+/1C-                                | hC+     |
| <i>Lactobacillus casei</i> ATCC 334                             | 4C- | C+/ $\beta$ C-/ $\beta$ C-          | 4C-                         | 4C-             | 4C-                           | 4C-            | 4C-                                   | hC+     |
| <b>Lactobacillus delbrueckii</b>                                |     |                                     |                             |                 |                               |                |                                       |         |
| <i>Lactobacillus delbrueckii</i> subsp. bulgaricus ATCC 11842   | 4C- | C+                                  | 4C-                         | 4C-             | 4C-                           | 4C-            | C+/1C-                                | hC+     |
| <i>Lactobacillus delbrueckii</i> subsp. bulgaricus ATCC BAA-365 | 4C- | C+                                  | 4C-                         | 4C-             | 4C-                           | 4C-            | C+/1C-                                | hC+     |
| <i>Lactobacillus fermentum</i> IFO 3956                         | 4C- | C+/ $\beta$ C-                      | 4C-                         | 4C-             | 4C-                           | C+             | C+/1C-                                | hC+     |
| <i>Lactobacillus gasseri</i> ATCC 33223                         | 4C- | 4C-                                 | 4C-                         | 4C-             | 4C-                           | 4C-            | C+/1C-                                | hC+     |
| <i>Lactobacillus helveticus</i> DPC 4571                        | 4C- | C+/C+                               | 4C-                         | 4C-             | 4C-                           | 4C-            | 1C-                                   | hC+     |
| <i>Lactobacillus johnsonii</i> NCC 533                          | 4C- | C+/ $\beta$ C-                      | 4C-                         | 4C-             | 4C-                           | 4C-            | C+/1C-                                | hC+     |
| <i>Lactobacillus plantarum</i> WCFSI                            | 4C- | C+/ $\beta$ C-                      | 4C-                         | 4C-             | 4C-                           | C+             | C+                                    | hC+     |
| <i>Lactobacillus reuteri</i> F275                               | 4C- | C+/C+/ $\beta$ C-/ $\beta$ C-       | 4C-/ $\beta$ C-             | 4C-/ $\beta$ C- | 4C-/ $\beta$ C-               | C+/C+          | 1C-/1C-                               | hC+     |
| <i>Lactobacillus sakei</i> subsp. sakei 23K                     | 4C- | 4C-                                 | 4C-                         | 4C-             | 4C-                           | 4C-            | C+/1C-                                | hC+     |
| <i>Lactobacillus salivarius</i> UCC118                          | 4C- | C+/ $\beta$ C-                      | 4C-                         | 4C-             | 4C-                           | C+             | C+/1C-                                | hC+     |
| <b>Lactococcus lactis</b>                                       |     |                                     |                             |                 |                               |                |                                       |         |
| <i>Lactococcus lactis</i> subsp. cremoris MG1363                | 4C- | C+                                  | 4C-                         | 3C-             | 4C-                           | 4C-            | C+/1C-                                | hC+     |
| <i>Lactococcus lactis</i> subsp. cremoris SK11                  | 4C- | C+                                  | 4C-                         | 3C-             | 4C-                           | 4C-            | C+/1C-/ $\beta$ C-                    | hC+     |
| <i>Lactococcus lactis</i> subsp. lactis III403                  | 4C- | C+/ $\beta$ C-                      | 4C-                         | 3C-             | 4C-                           | 4C-            | C+/1C-/ $\beta$ C-                    | hC+     |
| <i>Leuconostoc citreum</i> KM20                                 | 4C- | 4C-                                 | 4C-                         | 4C-             | 4C-                           | 4C-            | C+/ $\beta$ C-                        | hC+     |
| <i>Leuconostoc mesenteroides</i> subsp. mesenteroides ATCC 8293 | 4C- | 4C-                                 | 4C-                         | 4C-             | 4C-                           | 4C-            | C+/ $\beta$ C-                        | hC+     |
| <i>Listeria innocua</i> Clip11262                               | 4C- | C+/ $\beta$ C-                      | 3C-                         | 3C-             | 4C-                           | C+/ $\beta$ C- | C+/1C-                                | hC+     |
| <b>Listeria monocytogenes</b>                                   |     |                                     |                             |                 |                               |                |                                       |         |
| <i>Listeria monocytogenes</i> EGD-e                             | 4C- | C+/ $\beta$ C-                      | 3C-                         | 3C-             | 4C-                           | C+/ $\beta$ C- | C+/1C-                                | hC+     |
| <i>Listeria monocytogenes</i> str. 4b F2365                     | 4C- | C+/ $\beta$ C-                      | 3C-                         | 3C-             | 4C-                           | C+/ $\beta$ C- | C+/1C-                                | hC+     |
| <i>Listeria welshimeri</i> serovar 6b str. SLCC5334             | 4C- | C+                                  | 3C-                         | 3C-             | 4C-                           | C+             | 3C-                                   | hC+     |
| <i>Lysinibacillus sphaericus</i> C3-41                          | 4C- | C+/ $\beta$ C-                      | 3C-                         | 3C-             | 4C-                           | C+             | C+/ $\beta$ C-                        | hC+     |
| <i>Oceanobacillus ihyensensis</i> HTE831                        | 4C- | 4C-                                 | 3C-                         | 3C-             | 4C-                           | C+             | C+/ $\beta$ C-                        | hC+     |
| <i>Oenococcus oeni</i> PSU-1                                    | 4C- | 4C-                                 | 4C-                         | 4C-             | 4C-                           | 4C-            | 4C-                                   | hC+     |
| <i>Pediococcus pentosaceus</i> ATCC 25745                       | 4C- | C+/ $\beta$ C-                      | 4C-                         | 4C-             | 4C-                           | C+             | C+/1C-                                | hC+     |
| <b>Staphylococcus aureus</b>                                    |     |                                     |                             |                 |                               |                |                                       |         |

Table 1: (cont) Sequences used in the study

| Taxon                                                        | S4  | S14                | S18 | L28 | L31 | L32 | L33                         | L36 |
|--------------------------------------------------------------|-----|--------------------|-----|-----|-----|-----|-----------------------------|-----|
| Staphylococcus aureus RF122                                  | 4C- | C+ <sup>β</sup> C- | 3C- | 3C- | 4C- | C+  | 1C-/1C-                     | hC+ |
| Staphylococcus aureus subsp. aureus COL                      | 4C- | C+ <sup>β</sup> C- | 3C- | 3C- | 4C- | C+  | 1C-/1C-                     | hC+ |
| Staphylococcus aureus subsp. aureus JH1                      | 4C- | C+ <sup>β</sup> C- | 3C- | 3C- | 4C- | C+  | 1C-/1C-                     | hC+ |
| Staphylococcus aureus subsp. aureus JH9                      | 4C- | C+ <sup>β</sup> C- | 3C- | 3C- | 4C- | C+  | 1C-/1C-                     | hC+ |
| Staphylococcus aureus subsp. aureus MRSA252                  | 4C- | C+ <sup>β</sup> C- | 3C- | 3C- | 4C- | C+  | 1C-/1C-                     | hC+ |
| Staphylococcus aureus subsp. aureus MSSA476                  | 4C- | C+ <sup>β</sup> C- | 3C- | 3C- | 4C- | C+  | 1C-/1C-                     | hC+ |
| Staphylococcus aureus subsp. aureus MW2                      | 4C- | C+ <sup>β</sup> C- | 3C- | 3C- | 4C- | C+  | 1C-/1C-                     | hC+ |
| Staphylococcus aureus subsp. aureus Mu3                      | 4C- | C+ <sup>β</sup> C- | 3C- | 3C- | 4C- | C+  | 1C-/1C-                     | hC+ |
| Staphylococcus aureus subsp. aureus Mu50                     | 4C- | C+ <sup>β</sup> C- | 3C- | 3C- | 4C- | C+  | 1C-/1C-                     | hC+ |
| Staphylococcus aureus subsp. aureus N315                     | 4C- | C+ <sup>β</sup> C- | 3C- | 3C- | 4C- | C+  | 1C-/1C-                     | hC+ |
| Staphylococcus aureus subsp. aureus NCTC 8325                | 4C- | C+ <sup>β</sup> C- | 3C- | 3C- | 4C- | 1C- | 1C-/1C-                     | hC+ |
| Staphylococcus aureus subsp. aureus USA300                   | 4C- | C+ <sup>β</sup> C- | 3C- | 3C- | 4C- | C+  | 1C-/1C-                     | hC+ |
| Staphylococcus aureus subsp. aureus USA300 TCH1516           | 4C- | C+                 | 3C- | 3C- | 4C- | C+  | 1C-/1C-                     | hC+ |
| Staphylococcus aureus subsp. aureus str. Newman              | 4C- | C+ <sup>β</sup> C- | 3C- | 3C- | 4C- | C+  | 1C-/1C-                     | hC+ |
| <b>Staphylococcus epidermidis</b>                            |     |                    |     |     |     |     |                             |     |
| Staphylococcus epidermidis ATCC 12228                        | 4C- | C+ <sup>β</sup> C- | 3C- | 3C- | 4C- | C+  | 1C-/1C-                     | hC+ |
| Staphylococcus epidermidis RP62A                             | 4C- | C+ <sup>β</sup> C- | 3C- | 3C- | 4C- | C+  | 1C-/1C-                     | hC+ |
| Staphylococcus haemolyticus JCSC1435                         | 4C- | C+ <sup>β</sup> C- | 3C- | 3C- | 4C- | C+  | 1C-/1C-                     | hC+ |
| Staphylococcus saprophyticus subsp. saprophyticus ATCC 15305 | 4C- | C+ <sup>β</sup> C- | 3C- | 3C- | 4C- | C+  | C+ <sup>β</sup> 1C-<br>/1C- | hC+ |
| <b>Streptococcus agalactiae</b>                              |     |                    |     |     |     |     |                             |     |
| Streptococcus agalactiae 2603V/R                             | 4C- | C+ <sup>β</sup> C- | 4C- | 3C- | 4C- | 4C- | C+ <sup>β</sup> 1C-<br>/4C- | hC+ |
| Streptococcus agalactiae A909                                | 4C- | C+ <sup>β</sup> C- | 4C- | 3C- | 4C- | 4C- | 4C-                         | hC+ |
| Streptococcus agalactiae NEM316                              | 4C- | C+ <sup>β</sup> C- | 4C- | 3C- | 4C- | 4C- | 4C-                         | hC+ |
| Streptococcus gordonii str. Challis substr. CHI              | 4C- | C+                 | 4C- | 3C- | 4C- | 4C- | 4C-                         | hC+ |
| Streptococcus mutans UA159                                   | 4C- | C+                 | 4C- | 3C- | 4C- | 4C- | 1C-                         | hC+ |
| <b>Streptococcus pneumoniae</b>                              |     |                    |     |     |     |     |                             |     |
| Streptococcus pneumoniae CGSP14                              | 4C- | 3C-                | 4C- | 3C- | 4C- | 4C- | 4C-                         | hC+ |
| Streptococcus pneumoniae D39                                 | 4C- | 3C-                | 4C- | 3C- | 4C- | 4C- | 4C-                         | hC+ |
| Streptococcus pneumoniae Hungary19A-6                        | 4C- | 3C-                | 4C- | 3C- | 4C- | 4C- | 1C-/4C-                     | hC+ |
| Streptococcus pneumoniae R6                                  | 4C- | 3C-                | 4C- | 3C- | 4C- | 4C- | 1C-/4C-                     | hC+ |
| Streptococcus pneumoniae TIGR4                               | 4C- | 3C-                | 4C- | 3C- | 4C- | 4C- | 1C-/4C-                     | hC+ |
| <b>Streptococcus pyogenes</b>                                |     |                    |     |     |     |     |                             |     |
| Streptococcus pyogenes M1 GAS                                | 4C- | C+ <sup>β</sup> C- | 4C- | 3C- | 4C- | 4C- | 4C-                         | hC+ |
| Streptococcus pyogenes MGAS10270                             | 4C- | C+ <sup>β</sup> C- | 4C- | 3C- | 4C- | 4C- | 1C-/4C-                     | hC+ |
| Streptococcus pyogenes MGAS10394                             | 4C- | C+ <sup>β</sup> C- | 4C- | 3C- | 4C- | 4C- | 1C-/4C-                     | hC+ |
| Streptococcus pyogenes MGAS10750                             | 4C- | C+ <sup>β</sup> C- | 4C- | 3C- | 4C- | 4C- | 1C-/4C-                     | hC+ |
| Streptococcus pyogenes MGAS2096                              | 4C- | 4C-                | 4C- | 3C- | 4C- | 4C- | 1C-/4C-                     | hC+ |
| Streptococcus pyogenes MGAS315                               | 4C- | C+ <sup>β</sup> C- | 4C- | 3C- | 4C- | 4C- | 4C-                         | hC+ |
| Streptococcus pyogenes MGAS5005                              | 4C- | C+ <sup>β</sup> C- | 4C- | 3C- | 4C- | 4C- | 1C-/4C-                     | hC+ |
| Streptococcus pyogenes MGAS6180                              | 4C- | C+ <sup>β</sup> C- | 4C- | 3C- | 4C- | 4C- | 1C-/4C-                     | hC+ |
| Streptococcus pyogenes MGAS8232                              | 4C- | C+ <sup>β</sup> C- | 4C- | 3C- | 4C- | 4C- | 4C-                         | hC+ |
| Streptococcus pyogenes MGAS9429                              | 4C- | C+ <sup>β</sup> C- | 4C- | 3C- | 4C- | 4C- | 1C-/4C-                     | hC+ |
| Streptococcus pyogenes SSI-1                                 | 4C- | C+ <sup>β</sup> C- | 4C- | 3C- | 4C- | 4C- | 1C-/4C-                     | hC+ |
| Streptococcus pyogenes str. Manfredo                         | 4C- | C+ <sup>β</sup> C- | 4C- | 3C- | 4C- | 4C- | 1C-/4C-                     | hC+ |
| Streptococcus sanguinis SK36                                 | 4C- | C+                 | 4C- | 3C- | 4C- | 4C- | 4C-                         | hC+ |
| <b>Streptococcus suis</b>                                    |     |                    |     |     |     |     |                             |     |

Table 1: (cont) Sequences used in the study

| Taxon                                               | S4             | S14         | S18         | L28         | L31         | L32         | L33            | L36         |
|-----------------------------------------------------|----------------|-------------|-------------|-------------|-------------|-------------|----------------|-------------|
| Streptococcus suis 05ZYH33                          | 4C-            | 4C-         | 4C-         | 3C-         | 4C-         | 4C-         | 4C-            |             |
| Streptococcus suis 98HAH33                          | 4C-            | 4C-         | 4C-         | 3C-         | 4C-         | 4C-         | 4C-            |             |
| <b>Streptococcus thermophilus</b>                   |                |             |             |             |             |             |                |             |
| Streptococcus thermophilus CNRZ1066                 | 4C-            | C+          | 4C-         | 3C-         | 4C-         | 4C-         | 1C-/4C-        | hC+         |
| Streptococcus thermophilus LMD-9                    | 4C-            | C+          | 4C-         | 3C-         | 4C-         | 4C-         | C+/1C-<br>/4C- | hC+         |
| Streptococcus thermophilus LMG 18311                | 4C-            | C+          | 4C-         | 3C-         | 4C-         | 4C-         | 1C-/4C-        | hC+         |
| <b>Clostridia</b> (34)                              | <b>32/19</b>   | <b>32/0</b> | <b>32/1</b> | <b>31/0</b> | <b>33/0</b> | <b>29/0</b> | <b>30/0</b>    | <b>32/0</b> |
| Alkaliphilus metalliredigens QYMF                   | C+/4C-<br>/3C- | C+          | hC+         | C+          | C+          | C+          | C+             | hC+         |
| Alkaliphilus oremlandii OhLAs                       | C+/4C-         | C+          | hC+         | C+          | C+          | C+          | C+             | hC+         |
| Caldicellulosiruptor saccharolyticus DSM 8903       | C+             | C+          | hC+         | C+          | C+          | C+          | C+             | hC+         |
| Candidatus Desulforudis audaxviator MP104C          | C+             | C+          | hC+         | C+          | C+          | C+          | C+             | hC+         |
| Carboxydotherrnus hydrogenoformans Z-2901           | C+             | C+          | hC+         | C+          | C+          | C+          | C+             | hC+         |
| Clostridium acetobutylicum ATCC 824                 | C+/4C-<br>/4C- | C+          | hC+         | C+          | C+          | C+          | C+             | hC+         |
| Clostridium beijerinckii NCIMB 8052                 | C+             | C+          | hC+         | C+          | C+          | C+          | C+             | hC+         |
| <b>Clostridium botulinum</b>                        |                |             |             |             |             |             |                |             |
| Clostridium botulinum A str. ATCC 19397             | C+/4C-         | C+          | hC+         | C+          | C+          | C+          | C+             | hC+         |
| Clostridium botulinum A str. ATCC 3502              | C+/4C-         | C+          | hC+         | C+          | C+          | C+          | C+             | hC+         |
| Clostridium botulinum A str. Hall                   | C+/4C-         | C+          | hC+         | C+          | C+          | C+          | C+             | hC+         |
| Clostridium botulinum A3 str. Loch Maree            | C+/4C-         | C+          | hC+         | C+          | C+          | C+          | C+             | hC+         |
| Clostridium botulinum B str. Eklund 17B             | C+             | C+          | hC+         | C+          | C+          | C+          | C+             | hC+         |
| Clostridium botulinum B1 str. Okra                  | C+/4C-         | C+          | hC+         | C+          | C+          | C+          | C+             | hC+         |
| Clostridium botulinum F str. Langeland              | C+/4C-         | C+          | hC+         | C+          | C+          | C+          | C+             | hC+         |
| Clostridium difficile 630                           | C+/3C-         | C+          | hC+         | C+          | C+          | C+          | C+             | hC+         |
| Clostridium kluyveri DSM 555                        | C+/4C-         | C+          | hC+         | C+          | C+          | C+          | C+             | hC+         |
| Clostridium novyi NT                                | C+/4C-         | C+          | hC+         | C+          | C+          | C+          | C+             | hC+         |
| <b>Clostridium perfringens</b>                      |                |             |             |             |             |             |                |             |
| Clostridium perfringens ATCC 13124                  | C+/3C-         | C+          | hC+         | C+          | C+          | C+          | C+             | hC+         |
| Clostridium perfringens SM101                       | C+/3C-         | C+          | hC+         | C+          | C+          | C+          | C+             | hC+         |
| Clostridium perfringens str. 13                     | C+/3C-         | C+          | hC+         | C+          | C+          | C+          | C+             | hC+         |
| Clostridium phytofermentans ISDg                    | 3C-            | C+          | hC+         | C+          | C+          | C+          | C+             | hC+         |
| Clostridium tetani E88                              | C+             | C+          | hC+         | C+          | C+          | C+          | C+             | hC+         |
| Clostridium thermocellum ATCC 27405                 | C+             | C+          | hC+         | C+          | C+          | C+          | C+             | hC+         |
| Desulfitobacterium hafniense Y51                    | C+             | C+          | hC+         | C+          | C+          | C+          | C+             | hC+         |
| Desulfotomaculum reducens MI-1                      | C+             | C+          | hC+         | C+          | C+          | C+          | C+             | hC+         |
| Finegoldia magna ATCC 29328                         | 4C-            | C+          | 4C-         | C+          | C+          | C+          | C+             | hC+         |
| Hellobacterium modesticaldium Ice1                  | C+             | C+          | hC+         | C+          | C+          | C+          | C+             | hC+         |
| Moorella thermoacetica ATCC 39073                   | C+             | C+          | hC+         | C+          | C+          | C+          | C+             | hC+         |
| Pelotomaculum thermopropionicum SI                  | C+             | C+          | hC+         | C+          | C+          | C+          | C+             | hC+         |
| Symbiobacterium thermophilum IAM 14863              | C+/3C-         | C+          | hC+         | C+          | C+          | C+          | C+             | hC+         |
| Syntrophomonas wolfei subsp. wolfei str. Goettingen | C+             | C+          | hC+         | C+          | C+          | C+          | C+             | hC+         |
| Thermoanaerobacter pseudethanolicus ATCC 33223      | C+             | C+          | hC+         | C+          | C+          | C+          | C+             | hC+         |
| Thermoanaerobacter sp. X514                         | C+             | C+          | hC+         | C+          | C+          | C+          | C+             | hC+         |
| Thermoanaerobacter tengcongensis MB4                | C+             | C+          | hC+         | C+          | C+          | C+          | C+             | hC+         |
| <b>Fusobacteria</b> (6)                             | <b>0/6</b>     | <b>0/1</b>  | <b>0/1</b>  | <b>0/1</b>  | <b>0/1</b>  | <b>1/0</b>  | <b>0/1</b>     | <b>0/0</b>  |
| <b>Fusobacterium nucleatum</b>                      | <b>0/6</b>     | <b>0/1</b>  | <b>0/1</b>  | <b>0/1</b>  | <b>0/1</b>  | <b>1/0</b>  | <b>0/1</b>     | <b>0/0</b>  |

Table 1: (cont) Sequences used in the study

| Taxon                                                   | S4                  | S14                  | S18                  | L28                  | L31                  | L32                  | L33                  | L36                  |
|---------------------------------------------------------|---------------------|----------------------|----------------------|----------------------|----------------------|----------------------|----------------------|----------------------|
| Fusobacterium nucleatum subsp. nucleatum ATCC 25586     | 3C-                 | 3C-                  | 4C-                  | 2C-                  | 4C-                  | C+                   | 3C-                  | L36                  |
| Fusobacterium nucleatum subsp. polymorphum ATCC 10953 * | 3C-                 |                      |                      |                      |                      |                      |                      |                      |
| Fusobacterium nucleatum subsp. vincentii ATCC 49256 *   | 3C-                 |                      |                      |                      |                      |                      |                      |                      |
| Leptotrichia buccalis DSM 1135 *                        | 3C-                 |                      |                      |                      |                      |                      |                      |                      |
| Sebaldella termitidis ATCC 33386 *                      | 3C-                 |                      |                      |                      |                      |                      |                      |                      |
| Streptobacillus moniliformis DSM 12112 *                | 3C-                 |                      |                      |                      |                      |                      |                      |                      |
| <b>Planctomycetes</b> (4)                               | 1/4                 | 1/0                  | 0/1                  | 0/1                  | 1/0                  | 0/0                  | 0/1                  | 0/1                  |
| <b>Planctomycetacia</b> (4)                             | 1/4                 | 1/0                  | 0/1                  | 0/1                  | 1/0                  | 0/0                  | 0/1                  | 0/1                  |
| Blastopirellula marina DSM 3645 *                       | 4C-                 |                      |                      |                      |                      |                      |                      |                      |
| Gemmata obscuriglobus UQM 2246 *                        | C+/ <sup>h</sup> C- |                      |                      |                      |                      |                      |                      |                      |
| Planctomyces maris DSM 8797 *                           | 4C-                 |                      | 4C-                  | 4C-                  | C+                   |                      | 3C-                  | 2C-                  |
| Rhodopirellula baltica SH 1                             | 4C-                 |                      |                      |                      |                      |                      |                      |                      |
| <b>Proteobacteria</b> (347)                             | 27/325              | 41/308               | 21/329               | 16/325               | 186/234              | 31/260               | 14/310               | 188/152              |
| <b>Alphaproteobacteria</b> (87)                         | 0/87                | 0/89                 | 0/89                 | 0/86                 | 0/89                 | 18/67                | 0/74                 | 0/84                 |
| Acidiphilium cryptum JF-5                               | 4C-                 | 2C-                  | 3C-                  | 3C-                  | 4C-                  | C+                   | 4C-                  | 3C-                  |
| Agrobacterium tumefaciens str. C58                      | 4C-                 | 3C-                  | 3C-                  | 3C-                  | 4C-                  | 4C-                  | 4C-                  | 4C-                  |
| Anaplasma marginale str. St. Maries                     | 4C-                 | 3C-                  | 3C-                  | 3C-                  | 4C-                  | 3C-                  | 4C-                  | 3C-                  |
| Anaplasma phagocytophilum HZ                            | 4C-                 | 3C-                  | 3C-                  | 3C-                  | 4C-                  | 3C-                  | 4C-                  | 3C-                  |
| Azorhizobium caulinodans ORS 571                        | 4C-                 | 3C-                  | 3C-                  | 3C-                  | 4C-                  | 4C-                  | 4C-                  | 4C-                  |
| Bartonella bacilliformis KC583                          | 4C-                 | 3C-                  | 3C-                  | 3C-                  | 4C-                  | 4C-                  | 4C-                  | 4C-                  |
| Bartonella henselae str. Houston-1                      | 4C-                 | 3C-                  | 3C-                  | 3C-                  | 4C-                  | 4C-                  | 4C-                  | 4C-                  |
| Bartonella quintana str. Toulouse                       | 4C-                 | 3C-                  | 3C-                  | 3C-                  | 4C-                  | 4C-                  | 4C-                  | 4C-                  |
| Bartonella tribocorum CIP 105476                        | 4C-                 | 3C-                  | 3C-                  | 3C-                  | 4C-                  | 4C-                  | 4C-                  | 4C-                  |
| Bejerinckia indica subsp. indica ATCC 9039              | 4C-                 | 3C-                  | 3C-                  | 3C-                  | 4C-                  | 4C-                  | 4C-                  | 4C-                  |
| Bradyrhizobium japonicum USDA 110                       | 4C-                 | 3C-                  | 3C-                  | 3C-                  | 4C-                  | 4C-                  | 4C-                  | 4C-                  |
| Bradyrhizobium sp. BTA1                                 | 4C-                 | 3C-                  | 3C-                  | 3C-                  | 4C-                  | 4C-                  | 4C-                  | 4C-                  |
| Bradyrhizobium sp. ORS278                               | 4C-                 | 3C-                  | 3C-                  | 3C-                  | 4C-                  | 4C-                  | 4C-                  | 4C-                  |
| <b>Brucella abortus</b>                                 |                     |                      |                      |                      |                      |                      |                      |                      |
| Brucella abortus S19                                    | 4C-                 | 3C-                  | 3C-                  | 3C-                  | 4C-                  | 4C-                  | 4C-                  | 3C-                  |
| Brucella abortus bv. 1 str. 9-941                       | 4C-                 | 3C-                  | 3C-                  | 3C-                  | 4C-                  | 4C-                  | 4C-                  | 3C-                  |
| Brucella melitensis biovar Abortus 2308                 | 4C-                 | 3C-                  | 3C-                  | 3C-                  | 4C-                  | 4C-                  | 4C-                  | 3C-                  |
| Brucella canis ATCC 23365                               | 4C-                 | 3C-                  | 3C-                  | 3C-                  | 4C-                  | 4C-                  | 4C-                  | 3C-                  |
| Brucella melitensis 16M                                 | 4C-                 | 3C-                  | 3C-                  | 3C-                  | 4C-                  | 4C-                  | 4C-                  | 3C-                  |
| Brucella ovis ATCC 25840                                | 4C-                 | 3C-                  | 3C-                  | 3C-                  | 4C-                  | 4C-                  | 4C-                  | 3C-                  |
| <b>Brucella suis</b>                                    |                     |                      |                      |                      |                      |                      |                      |                      |
| Brucella suis 1330                                      | 4C-                 | 3C-                  | 3C-                  | 3C-                  | 4C-                  | 4C-                  | 4C-                  | 3C-                  |
| Brucella suis ATCC 23445                                | 4C-                 | 3C-                  | 3C-                  | 3C-                  | 4C-                  | 4C-                  | 4C-                  | 3C-                  |
| Candidatus Pelagibacter ubique HTCC1062                 | 4C-                 | 3C-                  | 3C-                  | 3C-                  | 4C-                  | 4C-                  | 4C-                  | 3C-                  |
| Caulobacter sp. K31                                     | 4C-                 | 3C-                  | 3C-                  | 3C-                  | 4C-                  | 4C-                  | 4C-                  | 3C-                  |
| Caulobacter crescentus CB 15                            | 4C-                 | 3C-                  | 3C-                  | 3C-                  | 4C-                  | 4C-                  | 4C-                  | 3C-                  |
| Dinoroseobacter shibbae DFL 12                          | 4C-                 | 3C-                  | 3C-                  | 3C-                  | 4C-                  | C+                   | 4C-                  | 3C-                  |
| Ehrlichia canis str. Jake                               | 4C-                 | 3C-                  | 3C-                  | 3C-                  | 4C-                  | 3C-                  | 4C-                  | 3C-                  |
| Ehrlichia chaffeensis str. Arkansas                     | 4C-                 | 3C-                  | 3C-                  | 3C-                  | 4C-                  | 3C-                  | 4C-                  | 3C-                  |
| <b>Ehrlichia ruminantium</b>                            |                     |                      |                      |                      |                      |                      |                      |                      |
| Ehrlichia ruminantium str. Gardel                       | 4C-                 | 3C-                  | 3C-                  | 3C-                  | 4C-                  | 3C-                  | 4C-                  | 3C-                  |
| Ehrlichia ruminantium str. Welgevonden                  | 4C-                 | 3C-/ <sup>h</sup> C- | 3C-/ <sup>h</sup> C- | 3C-/ <sup>h</sup> C- | 4C-/ <sup>h</sup> C- | 3C-/ <sup>h</sup> C- | 4C-/ <sup>h</sup> C- | 3C-/ <sup>h</sup> C- |
|                                                         |                     | 3C-/ <sup>h</sup> C- | 3C-/ <sup>h</sup> C- | 3C-/ <sup>h</sup> C- | 4C-/ <sup>h</sup> C- | 3C-/ <sup>h</sup> C- | 4C-/ <sup>h</sup> C- | 3C-/ <sup>h</sup> C- |

Table 1: (cont) Sequences used in the study

| Taxon                                                 | S4  | S14 | S18 | L28 | L31 | L32 | L33 | L36 |
|-------------------------------------------------------|-----|-----|-----|-----|-----|-----|-----|-----|
| <i>Ehrlichia ruminantium</i> str. Welgevonden CIRAD   | 4C- |     |     |     |     |     |     |     |
| <i>Erythrobacter litoralis</i> HTCC2594               | 4C- | 3C- | 3C- | 3C- | 4C- | C+  | 4C- | 3C- |
| <i>Gluconacetobacter diazotrophicus</i> PAI 5         | 4C- | 2C- | 3C- | 3C- | 4C- | C+  | 4C- | 3C- |
| <i>Gluconobacter oxydans</i> 621H                     | 4C- | 3C- | 3C- | 3C- | 4C- | C+  | 4C- | 3C- |
| <i>Granulifactor betshedsensis</i> CGDNIHI            | 4C- | 2C- | 3C- | 3C- | 4C- | C+  | 4C- | 3C- |
| <i>Hyphomonas neptunium</i> ATCC 15444                | 4C- | 3C- | 4C- | 3C- | 4C- | 4C- | 4C- | 3C- |
| <i>Jannaschia</i> sp. CCS1                            | 4C- | 4C- | 4C- | 3C- | 4C- | C+  | 4C- | 3C- |
| <i>Magnetospirillum magneticum</i> AMB-1              | 4C- | 2C- | 3C- | 3C- | 4C- | C+  | 4C- | 3C- |
| <i>Mariacaulis maris</i> MCS10                        | 4C- | 3C- | 3C- | 3C- | 4C- | 4C- | 4C- | 3C- |
| <i>Mesorhizobium loti</i> MAFF303099                  | 4C- | 3C- | 3C- | 3C- | 4C- | 4C- | 4C- | 4C- |
| <i>Mesorhizobium</i> sp. BNC1                         | 4C- | 3C- | 3C- | 3C- | 4C- | 4C- | 4C- | 4C- |
| <i>Methylobacterium extorquens</i> PAI                | 4C- | 3C- | 3C- | 3C- | 4C- | 4C- | 4C- | 4C- |
| <i>Methylobacterium radiotolerans</i> JCM 2831        | 4C- | 3C- | 3C- | 3C- | 4C- | 4C- | 4C- | 4C- |
| <i>Methylobacterium</i> sp. 4-46                      | 4C- | 3C- | 3C- | 3C- | 4C- | 4C- | 4C- | 4C- |
| <i>Neorickettsia sennetsu</i> str. Miyayama           | 4C- | 3C- | 4C- | 3C- | 4C- | 4C- | 4C- | 4C- |
| <i>Nitrobacter hamburgensis</i> X14                   | 4C- | 3C- | 3C- | 3C- | 4C- | 4C- | 4C- | 4C- |
| <i>Nitrobacter winogradskyi</i> Nb-255                | 4C- | 3C- | 3C- | 3C- | 4C- | 4C- | 4C- | 4C- |
| <i>Novosphingobium aromaticivorans</i> DSM 12444      | 4C- | 2C- | 3C- | 3C- | 4C- | C+  | 4C- | 4C- |
| <i>Ochrobactrum anthropi</i> ATCC 49188               | 4C- | 3C- | 3C- | 3C- | 4C- | 4C- | 4C- | 3C- |
| <b>Orientia tsutsugamushi</b>                         |     |     |     |     |     |     |     |     |
| <i>Orientia tsutsugamushi</i> str. Boryong            | 4C- | 2C- | 2C- | 3C- | 4C- | 3C- | 4C- | 3C- |
| <i>Orientia tsutsugamushi</i> str. Ikeda              | 4C- | 2C- | 2C- | 3C- | 4C- | 3C- | 4C- | 3C- |
| <i>Paracoccus denitrificans</i> PD1222                | 4C- | 3C- | 3C- | 3C- | 4C- | C+  | 4C- | 3C- |
| <i>Parvibaculum lavamentivorans</i> DS-1              | 4C- | 3C- | 3C- | 3C- | 4C- | 4C- | 4C- | 4C- |
| <b>Rhizobium etli</b>                                 |     |     |     |     |     |     |     |     |
| <i>Rhizobium etli</i> CFN 42                          | 4C- | 3C- | 3C- | 3C- | 4C- | 4C- | 4C- | 4C- |
| <i>Rhizobium etli</i> CIAT 652                        | 4C- | 3C- | 3C- | 3C- | 4C- | 4C- | 4C- | 4C- |
| <i>Rhizobium leguminosarum</i> bv. <i>viciae</i> 3841 | 4C- | 3C- | 3C- | 3C- | 4C- | 4C- | 4C- | 4C- |
| <b>Rhodobacter sphaeroides</b>                        |     |     |     |     |     |     |     |     |
| <i>Rhodobacter sphaeroides</i> 2.4.1                  | 4C- | 3C- | 3C- | 3C- | 4C- | C+  | 4C- | 3C- |
| <i>Rhodobacter sphaeroides</i> ATCC 17025             | 4C- | 3C- | 3C- | 3C- | 4C- | C+  | 4C- | 3C- |
| <i>Rhodobacter sphaeroides</i> ATCC 17029             | 4C- | 3C- | 3C- | 3C- | 4C- | C+  | 4C- | 3C- |
| <b>Rhodopseudomonas palustris</b>                     |     |     |     |     |     |     |     |     |
| <i>Rhodopseudomonas palustris</i> BisA53              | 4C- | 3C- | 3C- | 3C- | 4C- | 4C- | 4C- | 4C- |
| <i>Rhodopseudomonas palustris</i> BisB 18             | 4C- | 3C- | 3C- | 3C- | 4C- | 4C- | 4C- | 4C- |
| <i>Rhodopseudomonas palustris</i> BisB5               | 4C- | 3C- | 3C- | 3C- | 4C- | 4C- | 4C- | 4C- |
| <i>Rhodopseudomonas palustris</i> CGA009              | 4C- | 3C- | 3C- | 3C- | 4C- | 4C- | 4C- | 4C- |
| <i>Rhodopseudomonas palustris</i> Haa2                | 4C- | 3C- | 3C- | 3C- | 4C- | 4C- | 4C- | 4C- |
| <i>Rhodospirillum rubrum</i> ATCC 11170               | 4C- | 3C- | 3C- | 3C- | 4C- | C+  | 4C- | 3C- |
| <i>Rickettsia akari</i> str. Hartford                 | 4C- | 3C- | 2C- | 2C- | 4C- | 4C- | 4C- | 3C- |
| <b>Rickettsia bellii</b>                              |     |     |     |     |     |     |     |     |
| <i>Rickettsia bellii</i> OSU 85-389                   | 4C- | 3C- | 2C- | 2C- | 4C- | 4C- | 4C- | 3C- |
| <i>Rickettsia bellii</i> RML369-C                     | 4C- | 3C- | 2C- | 2C- | 4C- | 4C- | 4C- | 3C- |
| <i>Rickettsia canadensis</i> str. McKiel              | 4C- | 3C- | 2C- | 2C- | 4C- | 4C- | 4C- | 3C- |
| <i>Rickettsia conorii</i> str. Malish 7               | 4C- | 3C- | 2C- | 2C- | 4C- | 4C- | 4C- | 3C- |
| <i>Rickettsia felis</i> URRWXCal2                     | 4C- | 3C- | 2C- | 2C- | 4C- | 4C- | 4C- | 3C- |

Table 1: (cont) Sequences used in the study

| Taxon                                                     | S4          | S14                 | S18                 | L28                 | L31                 | L32                 | L33                 | L36          |
|-----------------------------------------------------------|-------------|---------------------|---------------------|---------------------|---------------------|---------------------|---------------------|--------------|
| <i>Rickettsia massilliae</i> MTU5                         | 4C-         | 3C-                 | 2C-                 | 2C-                 | 4C-                 | 4C-                 |                     | 3C-          |
| <i>Rickettsia prowazekii</i> str. Madrid E                | 4C-         | 3C-                 | 2C-                 | 2C-                 | 4C-                 | 4C-                 | 4C-                 | 3C-          |
| <b><i>Rickettsia rickettsii</i></b>                       |             |                     |                     |                     |                     |                     |                     |              |
| <i>Rickettsia rickettsii</i> str. 'Sheila Smith'          | 4C-         | 3C-                 | 2C-                 | 2C-                 | 4C-                 | 4C-                 |                     | 3C-          |
| <i>Rickettsia rickettsii</i> str. Iowa                    | 4C-         | 3C-                 | 2C-                 | 2C-                 | 4C-                 | 4C-                 |                     | 3C-          |
| <i>Rickettsia typhi</i> str. Wilmington                   | 4C-         | 3C-                 | 2C-                 | 2C-                 | 4C-                 | 4C-                 |                     | 3C-          |
| <i>Roseobacter denitrificans</i> OCh 114                  | 4C-         | 3C-                 | 3C-                 | 3C-                 | 4C-                 | C+                  | 4C-                 |              |
| <i>Silicibacter pomeroyi</i> DSS-3                        | 4C-         | 3C-                 | 3C-                 | 3C-                 | 4C-                 | C+                  | 4C-                 | 3C-          |
| <i>Silicibacter</i> sp. TM1040                            | 4C-         | 3C-                 | 3C-                 | 3C-                 | 4C-                 | C+                  | 4C-                 | 3C-          |
| <i>Sinorhizobium medicae</i> WSM419                       | 4C-         | 3C-                 | 3C-                 | 3C-                 | 4C-                 | 4C-                 | 4C-                 | 4C-          |
| <i>Sinorhizobium meliloti</i> 1021                        | 4C-         | 3C-                 | 3C-                 | 3C-                 | 4C-                 | 4C-                 | 4C-                 | 4C-          |
| <i>Sphingomonas wittichii</i> RW1                         | 4C-         | 2C-                 | 3C-                 | 3C-                 | 4C-                 | C+                  | 4C-                 | 4C-          |
| <i>Sphingopyxis alaskensis</i> RB2256                     | 4C-         | 2C-                 | 3C-                 | 3C-                 | 4C-                 | C+                  | 4C-                 | 4C-          |
| Wolbachia endosymbiont strain TRS of <i>Brugia malayi</i> | 4C-         | 2C-                 | 2C-                 | 3C-                 | 4C-                 | 3C-                 |                     | 2C-          |
| Wolbachia endosymbiont of <i>Drosophila melanogaster</i>  | 4C-         | 2C-                 | 2C-                 | 3C-                 | 4C-                 | 3C-                 |                     | 2C-          |
| <i>Wolbachia pipientis</i>                                | 4C-         | 2C-                 | 2C-                 | 3C-                 | 4C-                 | 3C-                 | 4C-                 | 4C-          |
| <i>Xanthobacter autotrophicus</i> Py2                     | 4C-         | 3C-                 | 3C-                 | 3C-                 | 4C-                 | 4C-                 |                     | 4C-          |
| <i>Zymomonas mobilis</i> subsp. <i>mobilis</i> ZM4        | 4C-         | 2C-                 | 3C-                 | 3C-                 | 4C-                 | 4C-                 |                     | 4C-          |
| <b>Betaproteobacteria (55)</b>                            | <b>7/50</b> | <b>0/56</b>         | <b>0/57</b>         | <b>0/56</b>         | <b>12/48</b>        | <b>0/56</b>         | <b>0/56</b>         | <b>46/77</b> |
| <i>Acidovorax avenae</i> subsp. <i>citrulli</i> AAC00-1   | C-(1)       | 3C-                 | 3C-                 | 3C-                 | 4C-                 | 4C-                 | 4C-                 | <i>hC+</i>   |
| <i>Acidovorax</i> sp. JS42                                | C-(1)       | 3C-                 | 3C-                 | 3C-                 | 4C-                 | 4C-                 | 4C-                 | <i>hC+</i>   |
| <i>Azoarcus</i> sp. BH72                                  | C+          | 2C-                 | 3C-                 | 3C-                 | C+                  | 4C-                 | 4C-                 | <i>hC+</i>   |
| <i>Azoarcus</i> sp. EbN1                                  | C+          | 2C-                 | 3C-                 | 3C-                 | C+                  | 4C-                 | 4C-                 | <i>hC+</i>   |
| <i>Bordetella avium</i> 197N                              | C-(1)       | 3C-                 | 3C-                 | 3C-                 | 4C-                 | 4C-                 | 4C-                 | <i>hC+</i>   |
| <i>Bordetella bronchiseptica</i> RB50                     | C-(1)       | 3C-                 | 3C-                 | 3C-                 | 4C-                 | 4C-                 | 4C-                 | <i>hC+</i>   |
| <i>Bordetella parapertussis</i> 12822                     | C-(1)       | 3C-                 | 3C-                 | 3C-                 | 4C-                 | 4C-                 | 4C-                 | <i>hC+</i>   |
| <i>Bordetella pertussis</i> Tohama I                      | C-(1)       | 3C-                 | 3C-                 | 3C-                 | 4C-                 | 4C-                 | 4C-                 | <i>hC+</i>   |
| <i>Bordetella petrii</i> DSM 12804                        | C-(1)       | 3C-                 | 3C-                 | 3C-                 | 4C-                 | 4C-                 | 4C-                 | <i>hC+</i>   |
| <b>Burkholderia ambifaria</b>                             |             |                     |                     |                     |                     |                     |                     |              |
| <i>Burkholderia ambifaria</i> AMMD                        | C-(1)       | 3C-                 | 3C-                 | 3C-                 | 4C-                 | 4C-                 | 4C-                 | <i>hC+</i>   |
| <i>Burkholderia ambifaria</i> MC40-6                      | C-(1)       | 3C-                 | 3C-                 | 3C-                 | 4C-                 | 4C-                 | 4C-                 | <i>hC+</i>   |
| <b>Burkholderia cenocepacia</b>                           |             |                     |                     |                     |                     |                     |                     |              |
| <i>Burkholderia cenocepacia</i> AU 1054                   | C-(1)       | 3C-                 | 3C-                 | 3C-                 | 4C-                 | 4C-                 | 4C-                 | <i>hC+</i>   |
| <i>Burkholderia cenocepacia</i> HI2424                    | C-(1)       | 3C-                 | 3C-                 | 3C-                 | 4C-                 | 4C-                 | 4C-                 | <i>hC+</i>   |
| <i>Burkholderia cenocepacia</i> MC0-3                     | C-(1)       | 3C-                 | 3C-                 | 3C-                 | 4C-                 | 4C-                 | 4C-                 | <i>hC+</i>   |
| <b>Burkholderia mallei</b>                                |             |                     |                     |                     |                     |                     |                     |              |
| <i>Burkholderia mallei</i> ATCC 23344                     | C-(1)       | 3C-                 | 3C-                 | 3C-                 | 4C-                 | 4C-                 | 4C-                 | <i>hC+</i>   |
| <i>Burkholderia mallei</i> NCTC 10229                     | C-(1)       | 3C-                 | 3C-                 | 3C-                 | 4C-                 | 4C-                 | 4C-                 | <i>hC+</i>   |
| <i>Burkholderia mallei</i> NCTC 10247                     | C-(1)       | 3C-                 | 3C-                 | 4C-                 | 4C-                 | 4C-                 | 4C-                 | <i>hC+</i>   |
| <i>Burkholderia mallei</i> SAVPI                          | C-(1)       | 3C-                 | 3C-                 | 3C-                 | 4C-                 | 4C-                 | 4C-                 | <i>hC+</i>   |
| <i>Burkholderia multivorans</i> ATCC 17616                | C-(1)       | 3C- <sup>β</sup> C- | 3C- <sup>β</sup> C- | 3C- <sup>β</sup> C- | 4C- <sup>β</sup> C- | 4C- <sup>β</sup> C- | 4C- <sup>β</sup> C- | <i>hC+</i>   |
| <i>Burkholderia phymatum</i> STM815                       | C-(1)       | 3C-                 | 3C-                 | 3C-                 | 4C-                 | 4C-                 | 4C-                 | <i>hC+</i>   |
| <b>Burkholderia pseudomallei</b>                          |             |                     |                     |                     |                     |                     |                     |              |
| <i>Burkholderia pseudomallei</i> 1106a                    | C-(1)       | 3C-                 | 3C-                 | 3C-                 | 4C-                 | 4C-                 | 4C-                 | <i>hC+</i>   |
| <i>Burkholderia pseudomallei</i> 1710b                    | C-(1)       | 3C-                 | 3C-                 | 3C-                 | 4C-                 | 4C-                 | 4C-                 | <i>hC+</i>   |
| <i>Burkholderia pseudomallei</i> 668                      | C-(1)       | 3C-                 | 3C-                 | 3C-                 | 4C-                 | 4C-                 | 4C-                 | <i>hC+</i>   |

Table 1: (cont) Sequences used in the study

| Taxon                                                     | S4          | S14         | S18         | L28         | L31         | L32         | L33         | L36         |
|-----------------------------------------------------------|-------------|-------------|-------------|-------------|-------------|-------------|-------------|-------------|
| Burkholderia pseudomallei K96243                          | C-(1)       | 3C-         | 3C-         | 3C-         | 4C-         | 4C-         | 4C-         | hC+         |
| Burkholderia sp. 383                                      | C-(1)       | 3C-         | 3C-         | 3C-         | 4C-         | 4C-         | 4C-         | hC+         |
| Burkholderia thailandensis E264                           | C-(1)       | 3C-         | 3C-         | 3C-         | 4C-         | 4C-         | 4C-         | hC+         |
| Burkholderia vietnamiensis G4                             | C-(1)       | 3C-         | 3C-         | 3C-         | 4C-         | 4C-         | 4C-         | hC+         |
| Burkholderia xenovorans LB400                             | C-(1)       | 3C-         | 3C-         | 3C-         | 4C-         | 4C-         | 4C-         | hC+         |
| Chromobacterium violaceum ATCC 12472                      | C-(1)       | 3C-         | 3C-         | 3C-         | C+          | 4C-         | 4C-         | hC+         |
| Ralstonia metallidurans CH34                              | C-(1)       | 3C-         | 3C-         | 3C-         | 4C-         | 4C-         | 4C-         | hC+         |
| <b>Cupriavidus necator</b>                                |             |             |             |             |             |             |             |             |
| Ralstonia eutropha H16                                    | C-(1)       | 3C-         | 3C-         | 3C-         | 4C-         | 4C-         | 4C-         | hC+         |
| Ralstonia eutropha JMP134                                 | C-(1)       | 3C-         | 3C-/3C-     | 3C-         | 3C-         | 4C-         | 4C-         | hC+         |
| Dechloromonas aromatica RCB                               | C+          | 2C-         | 3C-         | 3C-         | C+          | 4C-         | 4C-         | hC+         |
| Delftia acidovorans SPH-1                                 | C-(1)       | 3C-         | 3C-         | 3C-         | 4C-         | 4C-         | 4C-         | 2C-         |
| Hermiimonas arsenicoxydans                                | C-(1)       | 3C-         | 3C-         | 3C-         | 4C-         | 4C-         | 4C-         | hC+         |
| Janthinobacterium sp. Marseille                           | C-(1)       | 3C-         | 3C-         | 3C-         | 4C-         | 4C-         | 4C-         | hC+         |
| Leptothrix cholodnii SP-6                                 | C-(1)       | 3C-         | 3C-         | 3C-         | 4C-         | 4C-         | 4C-         | hC+         |
| Methylolibium petroleiphilum PM1                          | C-(1)       | 3C-         | 3C-         | 3C-         | 4C-         | 4C-         | 4C-         | hC+         |
| Methylobacillus flagellatus KT                            | 4C-/4C-     | 3C-         | 3C-         | 3C-         | 4C-         | 4C-         | 4C-         | hC+/2C-     |
| Neisseria gonorrhoeae FA 1090                             | C-(1)       | 3C-         | 3C-         | 3C-         | C+/4C-      | 4C-         | 4C-         | 2C-         |
| <b>Neisseria meningitidis</b>                             |             |             |             |             |             |             |             |             |
| Neisseria meningitidis 053442                             | C-(1)       | 3C-         | 3C-         | 3C-         | C+/4C-      | 4C-         | 4C-         | hC+/2C-     |
| Neisseria meningitidis FAM18                              | C-(1)       | 3C-         | 3C-         | 3C-         | C+/4C-      | 4C-         | 4C-         | hC+/2C-     |
| Neisseria meningitidis MC58                               | C-(1)       | 3C-         | 3C-         | 3C-         | C+/4C-      | 4C-         | 4C-         | hC+/2C-     |
| Neisseria meningitidis Z2491                              | C-(1)       | 3C-         | 3C-         | 3C-         | C+/4C-      | 4C-         | 4C-         | hC+/2C-     |
| Nitrosomonas europaea ATCC 19718                          | C+/4C-      | 3C-         | 3C-         | 3C-         | C+          | 4C-         | 4C-         | hC+/2C-     |
| Nitrosomonas eutropha C91                                 | C+          | 3C-         | 3C-         | 3C-         | C+          | 4C-         | 4C-         | hC+         |
| Nitrosospora multififormis ATCC 25196                     | C+          | 3C-         | 3C-         | 3C-         | C+          | 4C-         | 4C-         | hC+         |
| Polaromonas naphthalenivorans CJ2                         | C-(1)       | 3C-         | 3C-         | 3C-         | 4C-         | 4C-         | 4C-         | hC+         |
| Polaromonas sp. JS666                                     | C-(1)       | 3C-         | 3C-         | 3C-         | 4C-         | 4C-         | 4C-         | hC+         |
| Polynuclеobacter necessarius STIR1                        | C-(1)       | 3C-         | 3C-         | 3C-         | 4C-         | 4C-         | 4C-         | hC+         |
| Polynuclеobacter sp. QLW-PIDMWA-1                         | C-(1)       | 3C-         | 3C-         | 3C-         | 4C-         | 4C-         | 4C-         | hC+         |
| Ralstonia solanacearum GMI1000                            | C-(1)       | 3C-         | 3C-         | 3C-         | 4C-         | 4C-         | 4C-         | hC+         |
| Rhodoferrax ferrireducens T118                            | C-(1)       | 3C-         | 3C-         | 3C-         | 4C-         | 4C-         | 4C-         | hC+         |
| Thiobacillus denitrificans ATCC 25259                     | C-(1)       | 3C-         | 3C-         | 3C-         | 4C-         | 4C-         | 4C-         | hC+         |
| Verminephrobacter eiseniae EF01-2                         | C+          | 3C-         | 3C-         | 3C-         | C+          | 4C-         | 4C-         | hC+         |
| <b>Deltaproteobacteria (19)</b>                           | <b>19/3</b> | <b>17/1</b> | <b>17/1</b> | <b>16/2</b> | <b>17/1</b> | <b>12/1</b> | <b>11/5</b> | <b>12/0</b> |
| Anaeromyxobacter dehalogenans 2CP-C                       | C+          | C+          | hC+         | C+          | C+          | C+          | C+          | hC+         |
| Anaeromyxobacter sp. Fw109-5                              | C+          | C+          | hC+         | C+          | C+          | C+          | C+          | hC+         |
| Bdellovibrio bacteriovorus HD100                          | C+/4C-      | C+          | 4C-         | C+          | 3C-         | 4C-         | C+          | hC+         |
| Desulfococcus oleovorans Hxd3                             | C+          | C+          | hC+         | C+          | C+          | C+          | C+          | hC+         |
| Desulfotalea psychrophila LSY54                           | C+          | C+          | hC+         | C+          | C+          | C+          | C+          | hC+         |
| Desulfovibrio desulfuricans subsp. desulfuricans str. G20 | C+          | C+          | hC+         | C+          | C+          | C+          | C+          | hC+         |
| <b>Desulfovibrio vulgaris</b>                             |             |             |             |             |             |             |             |             |
| Desulfovibrio vulgaris subsp. vulgaris DP4                | C+          | C+          | hC+         | C+          | C+          | C+          | 1C-         | hC+         |
| Desulfovibrio vulgaris subsp. vulgaris str. Hildenborough | C+          | C+          | hC+         | C+          | C+          | C+          | 1C-         | hC+         |
| Geobacter lovleyi SZ                                      | C+          | C+          | hC+         | C+          | C+          | C+          | C+          | hC+         |
| Geobacter metallireducens GS-15                           | C+          | C+          | hC+         | C+          | C+          | C+          | C+          | hC+         |

Table 1: (cont) Sequences used in the study

| Taxon                                                      | S4                  | S14                  | S18                  | L28                  | L31                                  | L32                  | L33                  | L36                          |
|------------------------------------------------------------|---------------------|----------------------|----------------------|----------------------|--------------------------------------|----------------------|----------------------|------------------------------|
| <i>Geobacter sulfurreducens</i> PCA                        | C+                  | C+                   | <i>h</i> C+          | C+                   | C+                                   | C+                   | C+                   |                              |
| <i>Geobacter uraniireducens</i> Rf4                        | C+                  | C+                   | <i>h</i> C+          | C+                   | C+                                   | C+                   | C+                   |                              |
| <i>Lawsonia intracellularis</i> PHE/MN1-00                 | C+                  | C+                   | <i>h</i> C+          | C+                   | C+                                   | C+                   | C+                   |                              |
| <i>Mycococcus xanthus</i> DK 1622                          | C+/ <sup>β</sup> C- | C+/ <sup>β</sup> C-  | <i>h</i> C+          | C+/ <sup>β</sup> C-  | C+                                   | C+                   | C+/ <sup>β</sup> C-  | <i>h</i> C+                  |
| <i>Pelobacter carbinolicus</i> DSM 2380                    | C+                  | C+                   | <i>h</i> C+          | C+                   | C+                                   | C+                   | C+                   | <i>h</i> C+                  |
| <i>Pelobacter propionicus</i> DSM 2379                     | C+                  | C+                   | <i>h</i> C+          | C+                   | C+                                   | C+                   | C+                   |                              |
| <i>Sorangium cellulosum</i> 'So ce 56'                     | C+/ <sup>β</sup> C- | C+                   | <i>h</i> C+          | 4C-                  | C+                                   | C+                   | 4C-/1C-              | <i>h</i> C+                  |
| <i>Syntrophobacter fumaroxidans</i> MPOB                   | C+                  | C+                   | <i>h</i> C+          | C+                   | C+                                   | C+                   | C+                   |                              |
| <i>Syntrophus aciditrophicus</i> SB                        | C+                  | C+                   | <i>h</i> C+          | C+                   | C+                                   | C+                   | C+                   |                              |
| <b>Epsilonproteobacteria</b> (19)                          | 0/19                | 16/0                 | 3/16                 | 0/19                 | 13/6                                 | 0/17                 | 2/12                 | 11/0                         |
| <i>Arcobacter butzleri</i> RM4018                          | C-(II)              | C+                   | 3C-                  | 3C-                  | C+                                   | 4C-                  | 2C-                  | <i>h</i> C+                  |
| <i>Campylobacter concisus</i> 13826                        | C-(II)              | C+                   | 3C-                  | 3C-                  | C+                                   | 4C-                  |                      |                              |
| <i>Campylobacter curvus</i> 525:92                         | C-(II)              | C+                   | 3C-                  | 3C-                  | C+                                   |                      |                      |                              |
| <i>Campylobacter fetus</i> subsp. fetus 82-40              | C-(II)              | C+                   | 3C-                  | 3C-                  | C+                                   | 4C-                  |                      |                              |
| <i>Campylobacter hominis</i> ATCC BAA-381                  | C-(II)              | C+                   | 3C-                  | 3C-                  | C+                                   | 4C-                  | 1C-                  |                              |
| <b>Campylobacter jejuni</b>                                |                     |                      |                      |                      |                                      |                      |                      |                              |
| <i>Campylobacter jejuni</i> RM1221                         | C-(II)              | C+                   | 3C-                  | 3C-                  | C+                                   | 4C-                  | 1C-                  | <i>h</i> C+                  |
| <i>Campylobacter jejuni</i> subsp. doylei 269:97           | C-(II)              | C+                   | 3C-                  | 3C-                  | C+                                   | 4C-                  | 1C-                  |                              |
| <i>Campylobacter jejuni</i> subsp. jejuni 81-176           | C-(II)              | C+                   | 3C-                  | 3C-                  | C+                                   | 4C-                  | 1C-                  | <i>h</i> C+                  |
| <i>Campylobacter jejuni</i> subsp. jejuni 81116            | C-(II)              | C+                   | 3C-                  | 3C-                  | C+                                   | 4C-                  | 1C-                  | <i>h</i> C+                  |
| <i>Campylobacter jejuni</i> subsp. jejuni NCTC 11168       | C-(II)              | C+                   | 3C-                  | 3C-                  | C+                                   | 4C-                  | 1C-                  | <i>h</i> C+                  |
| <i>Helicobacter acinonychis</i> str. Sheeba                | C-(II)              | C+                   | 3C-                  | 3C-                  | 2C-                                  | 4C-                  | 1C-                  |                              |
| <i>Helicobacter hepaticus</i> ATCC 51449                   | C-(II)              | C+                   | 3C-                  | 3C-                  | 2C-                                  | 4C-                  | 2C-                  |                              |
| <b>Helicobacter pylori</b>                                 |                     |                      |                      |                      |                                      |                      |                      |                              |
| <i>Helicobacter pylori</i> 26695                           | C-(II)              | C+                   | 3C-                  | 3C-                  | 2C-                                  | 4C-                  | 1C-                  | <i>h</i> C+                  |
| <i>Helicobacter pylori</i> HPAG1                           | C-(II)              | C+                   | 3C-                  | 3C-                  | 2C-                                  | 4C-                  | 1C-                  | <i>h</i> C+                  |
| <i>Helicobacter pylori</i> J99                             | C-(II)              | C+                   | 3C-                  | 3C-                  | 2C-                                  | 4C-                  | 1C-                  | <i>h</i> C+                  |
| <i>Nitratiruptor</i> sp. SB155-2                           | C-(II)              | C+                   | <i>h</i> C+          | 3C-                  | C+                                   | 4C-                  | C+                   | <i>h</i> C+                  |
| <i>Sulfurimonas denitrificans</i> DSM 1251                 | C-(II)              | C+                   | <i>h</i> C+          | 3C-                  | C+                                   | 4C-                  | C+                   | <i>h</i> C+                  |
| <i>Sulfurovum</i> sp. NBC37-1                              | C-(II)              | C+                   | <i>h</i> C+          | 3C-                  | C+                                   | 4C-                  | C+                   | <i>h</i> C+                  |
| <i>Wolinella succinogenes</i> DSM 1740                     | C-(II)              | C+                   | 3C-                  | 3C-                  | 2C-                                  | 4C-                  | 2C-                  | <i>h</i> C+                  |
| <b>Gamma proteobacteria</b> (166)                          | 0/166               | 7/162                | 0/166                | 0/161                | 143/90                               | 0/136                | 0/163                | 118/61                       |
| <b>Acinetobacter baumannii</b>                             |                     |                      |                      |                      |                                      |                      |                      |                              |
| <i>Acinetobacter baumannii</i> ACICU                       | C-(I)               | 3C-                  | 3C-                  | 3C-                  | C+/ <sup>β</sup> C-                  | 4C-                  | 4C-                  | <i>h</i> C+                  |
| <i>Acinetobacter baumannii</i> ATCC 17978                  | C-(I)               | 3C-                  | 3C-                  | 3C-                  | C+/ <sup>β</sup> C-                  | 4C-                  | 4C-                  | <i>h</i> C+                  |
| <i>Acinetobacter baumannii</i> AYE                         | C-(I)               | 3C-/ <sup>β</sup> C- | 3C-/ <sup>β</sup> C- | 3C-/ <sup>β</sup> C- | C+/ <sup>β</sup> C-/ <sup>β</sup> C- | 4C-/ <sup>β</sup> C- | 4C-/ <sup>β</sup> C- | <i>h</i> C+                  |
| <i>Acinetobacter baumannii</i> SDF                         | C-(I)               | 3C-                  | 3C-                  | 3C-                  | C+/ <sup>β</sup> C-                  | 4C-                  | 4C-                  | <i>h</i> C+                  |
| <i>Acinetobacter</i> sp. ADP1                              | C-(I)               | 3C-                  | 3C-                  | 3C-                  | C+/ <sup>β</sup> C-                  | 4C-                  | 4C-                  | <i>h</i> C+                  |
| <b>Actinobacillus pleuropneumoniae</b>                     |                     |                      |                      |                      |                                      |                      |                      |                              |
| <i>Actinobacillus pleuropneumoniae</i> L20                 | C-(I)               | 3C-                  | 3C-                  | 3C-                  | C+/ <sup>β</sup> C-                  | 4C-                  | 4C-                  | <i>h</i> C+/ <sup>β</sup> C- |
| <i>Actinobacillus pleuropneumoniae</i> serovar 3 str. JL03 | C-(I)               | 3C-                  | 3C-                  | 3C-                  | C+/ <sup>β</sup> C-                  | 4C-                  | 4C-                  | <i>h</i> C+/ <sup>β</sup> C- |
| <i>Actinobacillus pleuropneumoniae</i> serovar 7 str. AP76 | C-(I)               | 3C-                  | 3C-                  | 3C-                  | C+/ <sup>β</sup> C-                  | 4C-                  | 4C-                  | <i>h</i> C+/ <sup>β</sup> C- |
| <i>Actinobacillus succinogenes</i> 130Z                    | C-(I)               | 3C-                  | 3C-                  | 3C-                  | C+                                   | 4C-                  | 4C-                  | <i>h</i> C+                  |
| <i>Aeromonas hydrophila</i> subsp. hydrophila ATCC 7966    | C-(I)               | 3C-                  | 3C-                  | 3C-                  | C+/ <sup>β</sup> C-                  | 4C-                  | 4C-                  | 2C-                          |
| <i>Aeromonas salmonicida</i> subsp. salmonicida A449       | C-(I)               | 3C-                  | 3C-                  | 3C-                  | C+/ <sup>β</sup> C-                  | 4C-                  | 4C-                  | <i>h</i> C+/ <sup>β</sup> C- |
| <i>Alcanivorax borkumensis</i> SK2                         | C-(I)               | 3C-                  | 3C-                  | 3C-                  | C+                                   | 4C-                  | 4C-                  | <i>h</i> C+                  |

Table 1: (cont) Sequences used in the study

| Taxon                                                               | S4    | S14     | S18     | L28     | L31    | L32     | L33     | L36     |
|---------------------------------------------------------------------|-------|---------|---------|---------|--------|---------|---------|---------|
| <i>Vibrio fischeri</i> ES114                                        | C-(1) | 3C-     | 3C-     | 3C-     | C+     | 4C-     | 4C-     | hC+     |
| <i>Alkalinimicrobia ehrlichei</i> MLHE-1                            | C-(0) | 3C-     | 3C-     | 3C-     | 4C-    | 4C-     | 4C-     | hC+     |
| <b>Buchnera aphidicola</b>                                          |       |         |         |         |        |         |         |         |
| <i>Buchnera aphidicola</i> str. APS (Acyrthosiphon pisum)           | C-(1) | 3C-     | 3C-     | 3C-     | C+     | 4C-     | 4C-     | hC+     |
| <i>Buchnera aphidicola</i> str. Bp (Baizongia pistaciae)            | C-(1) | 3C-     | 3C-     | 3C-     | C+     | 4C-     | 4C-     | hC+     |
| <i>Buchnera aphidicola</i> str. Cc (Cinara cedri)                   | C-(1) | 3C-     | 3C-     | 3C-     | C+     | 4C-     | 4C-     | hC+     |
| <i>Buchnera aphidicola</i> str. Sg (Schizaphis graminum)            | C-(1) | 3C-     | 3C-     | 3C-     | C+     | 4C-     | 4C-     | hC+     |
| <i>Candidatus Vesicosocius okutanii</i> HA                          | C-(1) | 3C-     | 3C-     | 3C-     | C+     | 4C-     | 4C-     | hC+     |
| <i>Baumannia cicadellimicola</i> str. Hc (Homalodisca coagulata)    | C-(1) | 3C-     | 3C-     | 3C-     | C+     | 4C-     | 4C-     | hC+     |
| <i>Candidatus Blochmannia floridanus</i>                            | C-(1) | 3C-     | 3C-     | 3C-     | C+     | 4C-     | 4C-     | hC+     |
| <i>Candidatus Blochmannia pennsylvanicus</i> str. BPEN              | C-(1) | 3C-     | 3C-     | 3C-     | C+     | 4C-     | 4C-     | hC+     |
| <i>Candidatus Carsonella ruddii</i> PV                              | C-(1) | 3C-     | 3C-     | 3C-     | C+     | 4C-     | 4C-     | hC+     |
| <i>Candidatus Ruthia magnifica</i> str. Cm (Calyptogenia magnifica) | C-(1) | 3C-     | 3C-     | 3C-     | C+     | 4C-     | 4C-     | hC+     |
| <i>Chromohalobacter salexigenus</i> DSM 3043                        | C-(1) | 3C-     | 3C-     | 3C-     | C+     | 4C-     | 4C-     | hC+     |
| <i>Citrobacter koseri</i> ATCC BAA-895                              | C-(1) | 3C-     | 3C-     | 3C-     | 4C-    | 4C-     | 4C-     | 2C-     |
| <i>Colwellia psychroerythraea</i> 34H                               | C-(1) | 3C-     | 3C-     | 3C-     | C+     | 4C-     | 4C-     | hC+     |
| <b>Coxiella burnetii</b>                                            |       |         |         |         |        |         |         |         |
| <i>Coxiella burnetii</i> Dugway 5J1108-111                          | C-(0) | hC+     | 2C-     | 3C-     | C+     | 4C-     | 4C-     | hC+     |
| <i>Coxiella burnetii</i> RSA 331                                    | C-(1) | hC+     | 2C-     | 3C-     | C+     | 4C-     | 4C-     | hC+     |
| <i>Coxiella burnetii</i> RSA 493                                    | C-(1) | hC+     | 2C-     | 3C-     | C+     | 4C-     | 4C-     | hC+     |
| <i>Dichelobacter nodosus</i> VCS1703A                               | C-(1) | 3C-     | 3C-     | 3C-     | 4C-    | 4C-     | 4C-     | hC+     |
| <i>Enterobacter sakazakii</i> ATCC BAA-894                          | C-(1) | 3C-     | 3C-     | 3C-     | C+/4C- | 4C-     | 4C-     | hC+/2C- |
| <i>Enterobacter</i> sp. 638                                         | C-(1) | 3C-     | 3C-     | 3C-     | C+/4C- | 4C-     | 4C-     | hC+/2C- |
| <i>Erwinia tasmaniensis</i>                                         | C-(1) | 3C-     | 3C-     | 3C-     | C+/4C- | 4C-     | 4C-     | hC+/2C- |
| <b>Escherichia coli</b>                                             |       |         |         |         |        |         |         |         |
| <i>Escherichia coli</i> 536                                         | C-(1) | 3C-     | 3C-     | 3C-     | C+/4C- | 4C-     | 4C-     | hC+/2C- |
| <i>Escherichia coli</i> APEC O1                                     | C-(1) | 3C-     | 3C-     | 3C-     | 4C-    | 4C-     | 4C-     | hC+/2C- |
| <i>Escherichia coli</i> ATCC 8739                                   | C-(1) | 3C-     | 3C-     | 3C-     | C+/4C- | 4C-     | 4C-     | hC+/2C- |
| <i>Escherichia coli</i> CFT073                                      | C-(1) | 3C-     | 3C-     | 3C-     | 4C-    | 4C-     | 4C-     | 2C-     |
| <i>Escherichia coli</i> E24377A                                     | C-(1) | 3C-     | 3C-     | 3C-     | 4C-    | 4C-     | 4C-     | hC+/2C- |
| <i>Escherichia coli</i> HS                                          | C-(1) | 3C-     | 3C-     | 3C-     | C+/4C- | 4C-     | 4C-     | hC+/2C- |
| <i>Escherichia coli</i> O157:H7 EDL933                              | C-(1) | 3C-     | 3C-     | 3C-     | C+/4C- | 4C-     | 4C-     | hC+     |
| <i>Escherichia coli</i> O157:H7 str. Sakai                          | C-(1) | 3C-     | 3C-     | 3C-     | C+/4C- | 4C-     | 4C-     | hC+/2C- |
| <i>Escherichia coli</i> SMS-3-5                                     | C-(1) | 3C-     | 3C-     | 3C-     | /4C-   | 4C-     | 4C-     | hC+/2C- |
| <i>Escherichia coli</i> UTI89                                       | C-(1) | 3C-     | 3C-     | 3C-     | C+/4C- | 4C-     | 4C-     | hC+/2C- |
| <i>Escherichia coli</i> str. K12 substr. DH10B                      | C-(1) | 3C-/3C- | 3C-/3C- | 3C-/3C- | 4C-    | 4C-/4C- | 4C-/4C- | hC+/2C- |
| <i>Escherichia coli</i> str. K12 substr. MG1655                     | C-(1) | 3C-/3C- | 3C-/3C- | 3C-/3C- | C+/4C- | 4C-/4C- | 4C-/4C- | hC+/2C- |
| <i>Escherichia coli</i> str. K12 substr. W3110                      | C-(1) | 3C-     | 3C-     | 3C-     | /4C-   | 4C-     | 4C-     | hC+/2C- |
| <i>Francisella tularensis</i> subsp. novicida U112                  | C-(1) | 2C-     | 3C-     | 3C-     | C+/4C- | 4C-     | 4C-     | hC+/2C- |
| <i>Francisella philomiragia</i> subsp. philomiragia ATCC 25017      | C-(1) | 2C-     | 3C-     | 3C-     | C+     | 4C-     | 4C-     | hC+     |
| <b>Francisella tularensis</b>                                       |       |         |         |         |        |         |         |         |
| <i>Francisella tularensis</i> subsp. holarctica                     | C-(1) | 2C-     | 3C-     | 3C-     | C+     | 4C-     | 4C-     | hC+     |
| <i>Francisella tularensis</i> subsp. holarctica FTNF002-00          | C-(1) | 2C-     | 3C-     | 3C-     | C+     | 4C-     | 4C-     | hC+     |
| <i>Francisella tularensis</i> subsp. holarctica OSU18               | C-(1) | 2C-     | 3C-     | 3C-     | C+     | 4C-     | 4C-     | hC+     |
| <i>Francisella tularensis</i> subsp. mediasiatica FSC147            | C-(1) | 2C-     | 3C-     | 3C-     | C+     | 4C-     | 4C-     | hC+     |
| <i>Francisella tularensis</i> subsp. tularensis FSC198              | C-(1) | 2C-     | 3C-     | 3C-     | C+     | 4C-     | 4C-     | hC+     |

Table 1: (cont) Sequences used in the study

| Taxon                                                                       | S4    | S14 | S18 | L28 | L31                 | L32 | L33 | L36                  |
|-----------------------------------------------------------------------------|-------|-----|-----|-----|---------------------|-----|-----|----------------------|
| <i>Francisella tularensis</i> subsp. <i>tularensis</i> SCHU S4              | C-(1) | 2C- | 3C- | 3C- | C+                  | 4C- | 4C- | hC+                  |
| <i>Francisella tularensis</i> subsp. <i>tularensis</i> WY96-3418            | C-(1) | 2C- | 3C- | 3C- | C+                  | 4C- | 4C- | hC+                  |
| <i>Haemophilus ducreyi</i> 35000HP                                          | C-(1) | 3C- | 3C- | 3C- | C+/ <sup>A</sup> C- | 4C- | 4C- | hC+/ <sup>2</sup> C- |
| <b>Haemophilus influenzae</b>                                               |       |     |     |     |                     |     |     |                      |
| <i>Haemophilus influenzae</i> 86-028NP                                      | C-(1) | 3C- | 3C- | 3C- | C+                  | 4C- | 4C- | hC+                  |
| <i>Haemophilus influenzae</i> PittEE                                        | C-(1) | 3C- | 3C- | 3C- | C+                  | 4C- | 4C- | hC+                  |
| <i>Haemophilus influenzae</i> PittGG                                        | C-(1) | 3C- | 3C- | 3C- | C+                  | 4C- | 4C- | hC+                  |
| <i>Haemophilus influenzae</i> Rd KW20                                       | C-(1) | 3C- | 3C- | 3C- | C+                  | 4C- | 4C- | hC+                  |
| <i>Hahella chejuensis</i> KCTC 2396                                         | C-(1) | 3C- | 3C- | 3C- | C+                  | 4C- | 4C- | hC+                  |
| <i>Halorhodospira halophila</i> SL1                                         | C-(1) | 3C- | 3C- | 3C- | 4C-                 | 4C- | 4C- | hC+                  |
| <b>Histophilus somni</b>                                                    |       |     |     |     |                     |     |     |                      |
| <i>Haemophilus somnus</i> 129PT                                             | C-(1) | 3C- | 3C- | 3C- | C+                  | 4C- | 4C- | hC+                  |
| <i>Haemophilus somnus</i> 2336                                              | C-(1) | 3C- | 3C- | 3C- | C+                  | 4C- | 4C- | hC+                  |
| <i>Idiomarina loihiensis</i> L2TR                                           | C-(1) | 3C- | 3C- | 3C- | C+                  | 4C- | 4C- | hC+                  |
| <i>Klebsiella pneumoniae</i> subsp. <i>pneumoniae</i> MGH 78578             | C-(1) | 3C- | 3C- | 3C- | C+/ <sup>A</sup> C- | 4C- | 4C- | 2C-                  |
| <b>Legionella pneumophila</b>                                               |       |     |     |     |                     |     |     |                      |
| <i>Legionella pneumophila</i> str. Corby                                    | C-(1) | C+  | 3C- | 3C- | C+                  | 4C- | 4C- | hC+                  |
| <i>Legionella pneumophila</i> str. Lens                                     | C-(1) | C+  | 3C- | 3C- | C+                  | 4C- | 4C- | hC+                  |
| <i>Legionella pneumophila</i> str. Paris                                    | C-(1) | C+  | 3C- | 3C- | C+                  | 4C- | 4C- | hC+                  |
| <i>Legionella pneumophila</i> subsp. <i>pneumophila</i> str. Philadelphia 1 | C-(1) | C+  | 3C- | 3C- | C+                  | 4C- | 4C- | hC+                  |
| <i>Mannheimia succiniciproducens</i> MBEL55E                                | C-(1) | 3C- | 3C- | 3C- | C+                  | 4C- | 4C- | hC+                  |
| <i>Marinobacter aquaeolei</i> VT8                                           | C-(1) | 3C- | 3C- | 3C- | C+                  | 4C- | 4C- | hC+                  |
| <i>Marinomonas</i> sp. MWYL1                                                | C-(1) | 3C- | 3C- | 3C- | C+                  | 4C- | 4C- | hC+                  |
| <i>Methylococcus capsulatus</i> str. Bath                                   | C-(1) | 3C- | 3C- | 3C- | C+                  | 4C- | 4C- | hC+                  |
| <i>Nitrosococcus oceanus</i> ATCC 19707                                     | C-(1) | 3C- | 3C- | 3C- | C+/ <sup>A</sup> C- | 4C- | 4C- | hC+                  |
| <i>Pasteurella multocida</i> subsp. <i>multocida</i> str. Pm70              | C-(1) | 3C- | 3C- | 3C- | C+/ <sup>A</sup> C- | 4C- | 4C- | hC+                  |
| <i>Pectobacterium atrosepticum</i> SCRI1043                                 | C-(1) | 3C- | 3C- | 3C- | C+/ <sup>A</sup> C- | 4C- | 4C- | hC+                  |
| <i>Photobacterium profundum</i> SS9                                         | C-(1) | 3C- | 3C- | 3C- | C+/ <sup>A</sup> C- | 4C- | 4C- | hC+                  |
| <i>Photorhabdus luminescens</i> subsp. <i>laumondii</i> T101                | C-(1) | 3C- | 3C- | 3C- | C+/ <sup>A</sup> C- | 4C- | 4C- | hC+                  |
| <i>Pseudoalteromonas atlantica</i> T6c                                      | C-(1) | 3C- | 3C- | 3C- | C+                  | 4C- | 4C- | hC+                  |
| <i>Pseudoalteromonas haloplanktis</i> TAC125                                | C-(1) | 3C- | 3C- | 3C- | C+                  | 4C- | 4C- | 2C-                  |
| <b>Pseudomonas aeruginosa</b>                                               |       |     |     |     |                     |     |     |                      |
| <i>Pseudomonas aeruginosa</i> PA7                                           | C-(1) | 3C- | 3C- | 3C- | C+/ <sup>A</sup> C- | 4C- | 4C- | hC+/ <sup>2</sup> C- |
| <i>Pseudomonas aeruginosa</i> PAO1                                          | C-(1) | 3C- | 3C- | 3C- | C+/ <sup>A</sup> C- | 4C- | 4C- | hC+/ <sup>2</sup> C- |
| <i>Pseudomonas aeruginosa</i> UCBCPP-PA14                                   | C-(1) | 3C- | 3C- | 3C- | C+/ <sup>A</sup> C- | 4C- | 4C- | hC+/ <sup>2</sup> C- |
| <i>Pseudomonas entomophila</i> L48                                          | C-(1) | 3C- | 3C- | 3C- | C+/ <sup>A</sup> C- | 4C- | 4C- | hC+                  |
| <b>Pseudomonas fluorescens</b>                                              |       |     |     |     |                     |     |     |                      |
| <i>Pseudomonas fluorescens</i> Pf-5                                         | C-(1) | 3C- | 3C- | 3C- | C+/ <sup>A</sup> C- | 4C- | 4C- | 2C-                  |
| <i>Pseudomonas fluorescens</i> PfO-1                                        | C-(1) | 3C- | 3C- | 3C- | C+                  | 4C- | 4C- | hC+                  |
| <i>Pseudomonas mendocina</i> ymp                                            | C-(1) | 3C- | 3C- | 3C- | C+                  | 4C- | 4C- | hC+                  |
| <b>Pseudomonas putida</b>                                                   |       |     |     |     |                     |     |     |                      |
| <i>Pseudomonas putida</i> F1                                                | C-(1) | 3C- | 3C- | 3C- | C+                  | 4C- | 4C- | hC+                  |
| <i>Pseudomonas putida</i> GB-1                                              | C-(1) | 3C- | 3C- | 3C- | C+                  | 4C- | 4C- | hC+                  |
| <i>Pseudomonas putida</i> KT2440                                            | C-(1) | 3C- | 3C- | 3C- | C+                  | 4C- | 4C- | hC+                  |
| <i>Pseudomonas putida</i> W619                                              | C-(1) | 3C- | 3C- | 3C- | C+                  | 4C- | 4C- | hC+                  |
| <i>Pseudomonas syringae</i> pv. <i>phaseolicola</i> 1448A                   | C-(1) | 3C- | 3C- | 3C- | C+                  | 4C- | 4C- | hC+                  |

Table 1: (cont) Sequences used in the study

| Taxon                                                                                     | S4    | S14 | S18 | L28 | L31                | L32 | L33 | L36                 |
|-------------------------------------------------------------------------------------------|-------|-----|-----|-----|--------------------|-----|-----|---------------------|
| <i>Pseudomonas stutzeri</i> A1501                                                         | C-(1) | 3C- | 3C- | 3C- | 4C-                | 4C- | 4C- | hC+                 |
| <i>Pseudomonas syringae</i> pv. <i>syringae</i> B728a                                     | C-(1) | 3C- | 3C- | 3C- | C+ <sup>A</sup> C- | 4C- | 4C- | hC+                 |
| <i>Pseudomonas syringae</i> pv. <i>tomato</i> str. DC3000                                 | C-(1) | 3C- | 3C- | 3C- | C+ <sup>A</sup> C- | 4C- | 4C- | hC+                 |
| <i>Psychrobacter arcticus</i> 273-4                                                       | C-(1) | 3C- | 3C- | 3C- | 4C-                | 4C- | 4C- | hC+                 |
| <i>Psychrobacter cryohalolentis</i> K5                                                    | C-(1) | 3C- | 3C- | 3C- | 4C-                | 4C- | 4C- | hC+                 |
| <i>Psychrobacter</i> sp. PRwf-1                                                           | C-(1) | 3C- | 3C- | 3C- | 4C-                | 4C- | 4C- | hC+                 |
| <i>Psychromonas ingrahamii</i> 37                                                         | C-(1) | 3C- | 2C- | 3C- | C+                 | 4C- | 4C- | hC+ <sup>h</sup> C+ |
| <i>Saccharophagus degradans</i> 2-40                                                      | C-(1) | 2C- | 3C- | 3C- | C+                 | 4C- | 4C- | hC+                 |
| <b>Salmonella enterica</b>                                                                |       |     |     |     |                    |     |     |                     |
| <i>Salmonella enterica</i> subsp. <i>arizonae</i> serovar 62:z4,z23:-                     | C-(1) | 3C- | 3C- | 3C- | C+ <sup>A</sup> C- | 4C- | 4C- | hC+ <sup>h</sup> C- |
| <i>Salmonella enterica</i> subsp. <i>enterica</i> serovar <i>Choleraesuis</i> str. SC-B67 | C-(1) | 3C- | 3C- | 3C- | C+ <sup>A</sup> C- | 4C- | 4C- | 2C-                 |
| <i>Salmonella enterica</i> subsp. <i>enterica</i> serovar <i>Paratyphi B</i> str. SPB7    | C-(1) | 3C- | 3C- | 4C- | C+ <sup>A</sup> C- | 4C- | 4C- | hC+ <sup>h</sup> C- |
| <i>Salmonella enterica</i> subsp. <i>enterica</i> serovar <i>Typhi</i> str. CT18          | C-(1) | 3C- | 3C- | 3C- | C+ <sup>A</sup> C- | 4C- | 4C- | hC+ <sup>h</sup> C- |
| <i>Salmonella enterica</i> subsp. <i>enterica</i> serovar <i>Typhi</i> str. Ty2           | C-(1) | 3C- | 3C- | 3C- | C+ <sup>A</sup> C- | 4C- | 4C- | hC+ <sup>h</sup> C- |
| <i>Salmonella enterica</i> subsp. <i>enterica</i> serovar <i>Typhi</i> str. ATCC 9150     | C-(1) | 3C- | 3C- | 3C- | C+ <sup>A</sup> C- | 4C- | 4C- | 2C-                 |
| <i>Salmonella typhimurium</i> LT2                                                         | C-(1) | 3C- | 3C- | 3C- | C+ <sup>A</sup> C- | 4C- | 4C- | hC+                 |
| <i>Serratia proteamaculans</i> 568                                                        | C-(1) | 3C- | 3C- | 3C- | C+                 | 4C- | 4C- | hC+                 |
| <i>Shewanella amazonensis</i> SB2B                                                        | C-(1) | 3C- | 3C- | 3C- | C+                 | 4C- | 4C- | hC+                 |
| <b>Shewanella baltica</b>                                                                 |       |     |     |     |                    |     |     |                     |
| <i>Shewanella baltica</i> OS155                                                           | C-(1) | 3C- | 3C- | 3C- | C+                 | 4C- | 4C- | hC+                 |
| <i>Shewanella baltica</i> OS185                                                           | C-(1) | 3C- | 3C- | 3C- | C+                 | 4C- | 4C- | hC+                 |
| <i>Shewanella baltica</i> OS195                                                           | C-(1) | 3C- | 3C- | 3C- | C+                 | 4C- | 4C- | hC+                 |
| <i>Shewanella denitrificans</i> OS217                                                     | C-(1) | 3C- | 3C- | 3C- | C+                 | 4C- | 4C- | hC+                 |
| <i>Shewanella frigidimarina</i> NCIMB 400                                                 | C-(1) | 3C- | 3C- | 3C- | C+                 | 4C- | 4C- | hC+                 |
| <i>Shewanella halifaxensis</i> HAW-EB4                                                    | C-(1) | 3C- | 3C- | 3C- | C+                 | 4C- | 4C- | hC+                 |
| <i>Shewanella loihica</i> PV-4                                                            | C-(1) | 3C- | 3C- | 3C- | C+                 | 4C- | 4C- | hC+                 |
| <i>Shewanella oneidensis</i> MR-1                                                         | C-(1) | 3C- | 3C- | 3C- | C+                 | 4C- | 4C- | hC+                 |
| <i>Shewanella pealeana</i> ATCC 700345                                                    | C-(1) | 3C- | 3C- | 3C- | C+                 | 4C- | 4C- | hC+                 |
| <i>Shewanella putrefaciens</i> CN-32                                                      | C-(1) | 3C- | 3C- | 3C- | C+                 | 4C- | 4C- | hC+                 |
| <i>Shewanella sediminis</i> HAW-EB3                                                       | C-(1) | 3C- | 3C- | 3C- | C+                 | 4C- | 4C- | hC+                 |
| <i>Shewanella</i> sp. ANA-3                                                               | C-(1) | 3C- | 3C- | 3C- | C+                 | 4C- | 4C- | hC+                 |
| <i>Shewanella</i> sp. MR-4                                                                | C-(1) | 3C- | 3C- | 3C- | C+                 | 4C- | 4C- | hC+                 |
| <i>Shewanella</i> sp. MR-7                                                                | C-(1) | 3C- | 3C- | 3C- | C+                 | 4C- | 4C- | hC+                 |
| <i>Shewanella</i> sp. W3-18-1                                                             | C-(1) | 3C- | 3C- | 3C- | C+                 | 4C- | 4C- | hC+                 |
| <i>Shewanella woodyi</i> ATCC 51908                                                       | C-(1) | 3C- | 3C- | 3C- | C+                 | 4C- | 4C- | hC+                 |
| <b>Shigella boydii</b>                                                                    |       |     |     |     |                    |     |     |                     |
| <i>Shigella boydii</i> CDC 3083-94                                                        | C-(1) | 3C- | 3C- | 3C- | C+                 | 4C- | 4C- | hC+                 |
| <i>Shigella boydii</i> Sb227                                                              | C-(1) | 3C- | 3C- | 3C- | C+ <sup>A</sup> C- | 4C- | 4C- | hC+                 |
| <i>Shigella dysenteriae</i> Sd197                                                         | C-(1) | 3C- | 3C- | 3C- | C+                 | 4C- | 4C- | hC+                 |
| <b>Shigella flexneri</b>                                                                  |       |     |     |     |                    |     |     |                     |
| <i>Shigella flexneri</i> 2a str. 2457T                                                    | C-(1) | 3C- | 3C- | 3C- | C+                 | 4C- | 4C- | hC+                 |
| <i>Shigella flexneri</i> 2a str. 301                                                      | C-(1) | 3C- | 3C- | 3C- | C+                 | 4C- | 4C- | hC+                 |
| <i>Shigella flexneri</i> 5 str. 8401                                                      | C-(1) | 3C- | 3C- | 3C- | C+                 | 4C- | 4C- | hC+                 |
| <i>Shigella sonnei</i> Ss046                                                              | C-(1) | 3C- | 3C- | 3C- | C+                 | 4C- | 4C- | hC+                 |
| <i>Sodalis glossinidius</i> str. 'morsitans'                                              | C-(1) | 3C- | 3C- | 3C- | C+                 | 4C- | 4C- | hC+                 |
| <i>Stenotrophomonas maltophilia</i> K279a                                                 | C-(1) | 3C- | 3C- | 3C- | 4C-                | 4C- | 4C- | 2C-                 |

Table 1: (cont) Sequences used in the study

| Taxon                                                           | S4      | S14  | S18         | L28 | L31                 | L32 | L33 | L36                          |
|-----------------------------------------------------------------|---------|------|-------------|-----|---------------------|-----|-----|------------------------------|
| <i>Thiomicrospira crunogena</i> XCL-2                           | C-(0)   | 3C-  | 3C-         | 3C- | 4C-                 | 4C- | 4C- | 3C-                          |
| <b>Vibrio cholerae</b>                                          |         |      |             |     |                     |     |     |                              |
| Vibrio cholerae O1 biovar El Tor str. N16961                    | C-(0)   | 3C-  | 3C-         | 3C- | C+/ <sup>A</sup> C- | 4C- | 4C- | <i>h</i> C+/ <sup>2</sup> C- |
| Vibrio cholerae O395                                            | C-(0)   | 3C-  | 3C-         | 3C- | C+/ <sup>d</sup> C- | 4C- | 4C- | <i>h</i> C+/ <sup>2</sup> C- |
| Vibrio harveyi ATCC BAA-1116                                    | C-(0)   | 3C-  | 3C-         | 3C- | C+/ <sup>A</sup> C- | 4C- | 4C- | <i>h</i> C+/ <sup>2</sup> C- |
| Vibrio parahaemolyticus RIMD 2210633                            | C-(0)   | 3C-  | 3C-         | 3C- | C+/ <sup>A</sup> C- | 4C- | 4C- | <i>h</i> C+                  |
| <b>Vibrio vulnificus</b>                                        |         |      |             |     |                     |     |     |                              |
| Vibrio vulnificus CMCP6                                         | C-(0)   | 3C-  | 3C-         | 3C- | C+/ <sup>A</sup> C- | 4C- | 4C- | 2C-                          |
| Vibrio vulnificus YJ016                                         | C-(0)   | 3C-  | 3C-         | 3C- | C+/ <sup>d</sup> C- | 4C- | 4C- | <i>h</i> C+                  |
| Wigglesworthia glossinidia endosymbiont of Glossina brevipalpis | C-(0)   | 3C-  | 3C-         | 3C- | C+                  | 4C- | 4C- | 2C-                          |
| Xanthomonas axonopodis pv. citri str. 306                       | C-(0)   | 3C-  | 3C-         | 3C- | 4C-                 | 4C- | 4C- | 2C-                          |
| <b>Xanthomonas campestris</b>                                   |         |      |             |     |                     |     |     |                              |
| Xanthomonas campestris pv. campestris                           | C-(0)   | 3C-  | 3C-         | 3C- | 4C-                 | 4C- | 4C- | 2C-                          |
| Xanthomonas campestris pv. campestris str. 8004                 | C-(0)   | 3C-  | 3C-         | 3C- | 4C-                 | 4C- | 4C- | 2C-                          |
| Xanthomonas campestris pv. campestris str. ATCC 33913           | C-(0)   | 3C-  | 3C-         | 3C- | 4C-                 | 4C- | 4C- | 2C-                          |
| Xanthomonas campestris pv. vesicatoria str. 85-10               | C-(0)   | 3C-  | 3C-         | 3C- | 4C-                 | 4C- | 4C- | 2C-                          |
| <b>Xanthomonas oryzae</b>                                       |         |      |             |     |                     |     |     |                              |
| Xanthomonas oryzae pv. oryzae KACC10331                         | C-(0)   | 3C-  | 3C-         | 3C- | 4C-                 | 4C- | 4C- | 2C-                          |
| Xanthomonas oryzae pv. oryzae MAFF 311018                       | C-(0)   | 3C-  | 3C-         | 3C- | 4C-                 | 4C- | 4C- | 2C-                          |
| <b>Xylella fastidiosa</b>                                       |         |      |             |     |                     |     |     |                              |
| Xylella fastidiosa 9a5c                                         | C-(0)   | 3C-  | 3C-         | 3C- | 4C-                 | 4C- | 4C- | 2C-                          |
| Xylella fastidiosa M12                                          | C-(0)   | 3C-  | 3C-         | 3C- | 4C-                 | 4C- | 4C- | 2C-                          |
| Xylella fastidiosa M23                                          | C-(0)   | 3C-  | 3C-         | 3C- | 4C-                 | 4C- | 4C- | 2C-                          |
| Xylella fastidiosa Temecula 1                                   | C-(0)   | 3C-  | 3C-         | 3C- | 4C-                 | 4C- | 4C- | 2C-                          |
| Yersinia enterocolitica subsp. enterocolitica 8081              | C-(0)   | 3C-  | 3C-         | 3C- | C+/ <sup>A</sup> C- | 4C- | 4C- | <i>h</i> C+/ <sup>2</sup> C- |
| <b>Yersinia pestis</b>                                          |         |      |             |     |                     |     |     |                              |
| Yersinia pestis Angola                                          | C-(0)   | 3C-  | 3C-         | 3C- | C+                  | 4C- | 4C- | 2C-                          |
| Yersinia pestis Antiqua                                         | C-(0)   | 3C-  | 3C-         | 3C- | C+/ <sup>A</sup> C- | 4C- | 4C- | 2C-                          |
| Yersinia pestis CO92                                            | C-(0)   | 3C-  | 3C-         | 3C- | C+/ <sup>d</sup> C- | 4C- | 4C- | <i>h</i> C+/ <sup>2</sup> C- |
| Yersinia pestis KIM                                             | C-(0)   | 3C-  | 3C-         | 3C- | C+/ <sup>A</sup> C- | 4C- | 4C- | 2C-                          |
| Yersinia pestis Nepal516                                        | C-(0)   | 3C-  | 3C-         | 3C- | C+/ <sup>d</sup> C- | 4C- | 4C- | 2C-                          |
| Yersinia pestis Pestoides F                                     | C-(0)   | 3C-  | 3C-         | 3C- | C+/ <sup>A</sup> C- | 4C- | 4C- | 2C-                          |
| Yersinia pestis biovar Microtus str. 91001                      | C-(0)   | 3C-  | 3C-         | 3C- | C+/ <sup>d</sup> C- | 4C- | 4C- | <i>h</i> C+/ <sup>2</sup> C- |
| <b>Yersinia pseudotuberculosis</b>                              |         |      |             |     |                     |     |     |                              |
| Yersinia pseudotuberculosis IP 31758                            | C-(0)   | 3C-  | 3C-         | 3C- | C+/ <sup>A</sup> C- | 4C- | 4C- | 2C-                          |
| Yersinia pseudotuberculosis IP 32953                            | C-(0)   | 3C-  | 3C-         | 3C- | C+/ <sup>d</sup> C- | 4C- | 4C- | <i>h</i> C+/ <sup>2</sup> C- |
| Yersinia pseudotuberculosis YPIII                               | C-(0)   | 3C-  | 3C-         | 3C- | C+/ <sup>d</sup> C- | 4C- | 4C- | <i>h</i> C+/ <sup>2</sup> C- |
| <b>Unknown (class) (1)</b>                                      | 1/0     | 1/0  | 1/0         | 0/1 | 1/0                 | 1/0 | 1/0 | 1/0                          |
| Magnetococcus sp. MC-1                                          | C+      | C+   | <i>h</i> C+ | 4C- | C+                  | C+  | C+  | <i>h</i> C+                  |
| <b>Spirochaetes (12)</b>                                        | 0/13    | 12/0 | 5/7         | 3/9 | 9/3                 | 7/0 | 0/6 | 11/0                         |
| <b>Spirochaetes (class) (12)</b>                                | 0/13    | 12/0 | 5/7         | 3/9 | 9/3                 | 7/0 | 0/6 | 11/0                         |
| Borrelia afzelii PKo                                            | 4C-     | C+   | 2C-         | 3C- | 4C-                 | 2C- | 2C- | <i>h</i> C+                  |
| Borrelia burgdorferi B31                                        | 4C-     | C+   | 2C-         | 3C- | 4C-                 | 2C- | 2C- | <i>h</i> C+                  |
| Borrelia garinii PBI                                            | 4C-     | C+   | 2C-         | 3C- | 4C-                 | 2C- | 2C- | <i>h</i> C+                  |
| <b>Leptospira biflexa</b>                                       |         |      |             |     |                     |     |     |                              |
| Leptospira biflexa serovar Patoc strain 'Patoc 1 (Ames)'        | C-(III) | C+   | <i>h</i> C+ | 3C- | C+                  |     |     | <i>h</i> C+                  |

Table 1: (cont) Sequences used in the study

| Taxon                                                          | S4              | S14             | S18              | L28             | L31             | L32             | L33                 | L36                      |
|----------------------------------------------------------------|-----------------|-----------------|------------------|-----------------|-----------------|-----------------|---------------------|--------------------------|
| Leptospira biflexa serovar Patoc strain 'Patoc 1 (Paris)'      |                 |                 | <i>h</i> C+      | <sup>3</sup> C- | C+              |                 |                     |                          |
| <b>Leptospira borgpetersenii</b>                               |                 |                 |                  |                 |                 |                 |                     |                          |
| Leptospira borgpetersenii serovar Hardjo-bovis JB197           | C-(III)         | C+              | <sup>3</sup> C-  | <sup>3</sup> C- | C+              | C+              |                     | <i>h</i> C+              |
| Leptospira borgpetersenii serovar Hardjo-bovis L550            | C-(III)/C-(III) | C+/C+           | <sup>3</sup> C-  | <sup>3</sup> C- | C+              | C+              |                     | <i>h</i> C+/ <i>h</i> C+ |
| <b>Leptospira interrogans</b>                                  |                 |                 |                  |                 |                 |                 |                     |                          |
| Leptospira interrogans serovar Copenhageni str. Fiocruz L1-130 | C-(III)         | C+              | <sup>3</sup> C-  | <sup>3</sup> C- | C+              | C+              |                     | <i>h</i> C+              |
| Leptospira interrogans serovar Lai str. 56601                  | C-(III)         | C+              | <sup>3</sup> C-  | <sup>3</sup> C- | C+              | C+              |                     | <i>h</i> C+              |
| Treponema denticola ATCC 35405                                 | <sup>4</sup> C- | C+              | <i>h</i> C+      | C+              | C+              | C+              | <sup>1</sup> C-     | <i>h</i> C+              |
| <b>Treponema pallidum</b>                                      |                 |                 |                  |                 |                 |                 |                     |                          |
| Treponema pallidum subsp. pallidum SS14                        | <sup>4</sup> C- | C+              | <i>h</i> C+      | C+              | C+              | C+              | <sup>1</sup> C-     | <i>h</i> C+              |
| Treponema pallidum subsp. pallidum str. Nichols                | <sup>4</sup> C- | C+              | <i>h</i> C+      | C+              | C+              | C+              | <sup>1</sup> C-     | <i>h</i> C+              |
| <b>Tenericutes</b> (19)                                        | <b>0/18</b>     | <b>15/3</b>     | <b>10/9</b>      | <b>0/19</b>     | <b>18/1</b>     | <b>15/3</b>     | <b>17/1</b>         | <b>12/3</b>              |
| <b>Mollicutes</b> (19)                                         | <b>0/18</b>     | <b>15/3</b>     | <b>10/9</b>      | <b>0/19</b>     | <b>18/1</b>     | <b>15/3</b>     | <b>17/1</b>         | <b>12/3</b>              |
| Acholeplasma laidlawii PG-8A                                   | <sup>4</sup> C- | <sup>4</sup> C- | <sup>3</sup> C-  | <sup>3</sup> C- | <sup>4</sup> C- | <sup>4</sup> C- | C+/ <sup>1</sup> C- | <sup>4</sup> C-          |
| Aster yellows witches'-broom phytoplasma AYWB                  | <sup>4</sup> C- | <sup>4</sup> C- | <sup>3</sup> C-  | <sup>3</sup> C- | C+              | <sup>3</sup> C- | <sup>s</sup> C+     | <sup>4</sup> C-          |
| Mesoplasma florum L1                                           | <sup>4</sup> C- | C+              | <sup>4</sup> C-  | <sup>4</sup> C- | C+              | C+              | C+                  | <i>h</i> C+              |
| Mycoplasma agalactiae PG2                                      | <sup>4</sup> C- | C+              | <i>h</i> C+      | <sup>4</sup> C- | C+              | C+              | C+                  | <i>h</i> C+              |
| Mycoplasma capricolum subsp. capricolum ATCC 27343             | <sup>4</sup> C- | C+              | <sup>4</sup> C-  | <sup>4</sup> C- | C+              | C+              | C+                  | <i>h</i> C+              |
| Mycoplasma gallisepticum R                                     | <sup>4</sup> C- | C+              | <sup>4</sup> C-  | <sup>4</sup> C- | C+              | C+              | C+                  | <i>h</i> C+              |
| Mycoplasma genitalium G37                                      | <sup>4</sup> C- | C+              | <i>h</i> C+      | <sup>4</sup> C- | C+              | C+              | C+                  | <i>h</i> C+              |
| <b>Mycoplasma hyopneumoniae</b>                                |                 |                 |                  |                 |                 |                 |                     |                          |
| Mycoplasma hyopneumoniae 232                                   | <sup>4</sup> C- | C+              | <i>h</i> C+      | <sup>4</sup> C- | C+              | C+              |                     | <i>h</i> C+              |
| Mycoplasma hyopneumoniae 7448                                  | <sup>4</sup> C- | C+              | <i>h</i> C+      | <sup>4</sup> C- | C+              | C+              |                     | <i>h</i> C+              |
| Mycoplasma hyopneumoniae J                                     | <sup>4</sup> C- | C+              | <i>h</i> C+      | <sup>4</sup> C- | C+              | C+              |                     | <i>h</i> C+              |
| Mycoplasma mobile 163K                                         | <sup>4</sup> C- | C+              | <sup>2h</sup> C+ | <sup>4</sup> C- | C+              | C+              | C+                  | <i>h</i> C+              |
| Mycoplasma mycoides subsp. mycoides SC str. PG1                | <sup>4</sup> C- | C+              | <sup>4</sup> C-  | <sup>4</sup> C- | C+              | C+              |                     | <i>h</i> C+              |
| Mycoplasma penetrans HF-2                                      | <sup>4</sup> C- | C+              | <i>h</i> C+      | <sup>4</sup> C- | C+              | C+              | C+                  | <i>h</i> C+              |
| Mycoplasma pneumoniae M129                                     | <sup>4</sup> C- | C+              | <i>h</i> C+      | <sup>4</sup> C- | C+              | C+              | C+/C+               | <i>h</i> C+              |
| Mycoplasma pulmonis UAB CTIP                                   | <sup>4</sup> C- | C+              | <sup>4</sup> C-  | <sup>4</sup> C- | C+              | C+              | C+                  | <i>h</i> C+              |
| Mycoplasma synoviae 53                                         | <sup>4</sup> C- | C+              | <i>h</i> C+      | <sup>4</sup> C- | C+              | C+              | C+                  | <i>h</i> C+              |
| Onion yellows phytoplasma OY-M                                 | <sup>4</sup> C- | <sup>4</sup> C- | <sup>3</sup> C-  | <sup>3</sup> C- | C+              | <sup>3</sup> C- | <sup>s</sup> C+/C+  | <sup>4</sup> C-          |
| <b>Ureaplasma parvum</b>                                       |                 |                 |                  |                 |                 |                 |                     |                          |
| Ureaplasma parvum serovar 3 str. ATCC 27815                    | <sup>4</sup> C- | C+              | <sup>3</sup> C-  | <sup>4</sup> C- | C+              | C+              | <sup>s</sup> C+     | <i>h</i> C+              |
| Ureaplasma parvum serovar 3 str. ATCC 700970                   | <sup>4</sup> C- | C+              | <sup>3</sup> C-  | <sup>4</sup> C- | C+              | C+              | <sup>s</sup> C+/C+  | <i>h</i> C+              |
| <b>Thermotogae</b> (7)                                         | <b>6/1</b>      | <b>7/0</b>      | <b>7/0</b>       | <b>7/0</b>      | <b>7/0</b>      | <b>7/0</b>      | <b>7/0</b>          | <b>7/0</b>               |
| <b>Thermotogae</b> (class) (7)                                 |                 |                 |                  |                 |                 |                 |                     |                          |
| Fervidobacterium nodosum Rt17-B1                               | C+              | C+              | <i>h</i> C+      | C+              | C+              | C+              | C+                  | <i>h</i> C+              |
| Petrogoga mobilis SJ95                                         | C-(I)           | C+              | <i>h</i> C+      | C+              | C+              | C+              | C+                  | <i>h</i> C+              |
| Thermosiphon melanesiensis B1429                               | C+              | C+              | <i>h</i> C+      | C+              | C+              | C+              | C+                  | <i>h</i> C+              |
| Thermotoga lettingae TMO                                       | C+              | C+              | <i>h</i> C+      | C+              | C+              | C+              | C+                  | <i>h</i> C+              |
| Thermotoga maritima MSB8                                       | C+              | C+              | <i>h</i> C+      | C+              | C+              | C+              | C+                  | <i>h</i> C+              |
| Thermotoga petrophila RRU-1                                    | C+              | C+              | <i>h</i> C+      | C+              | C+              | C+              | C+                  | <i>h</i> C+              |
| Thermotoga sp. RQ2                                             | C+              | C+              | <i>h</i> C+      | C+              | C+              | C+              | C+                  | <i>h</i> C+              |
| <b>Verrucomicrobia</b> (7)                                     | <b>0/7</b>      | <b>0/1</b>      | <b>0/1</b>       | <b>0/1</b>      | <b>0/1</b>      | <b>0/1</b>      | <b>0/1</b>          | <b>0/1</b>               |
| <b>Opitutae</b> (2)                                            | <b>0/2</b>      | <b>0/1</b>      | <b>0/1</b>       | <b>0/1</b>      | <b>0/1</b>      | <b>0/1</b>      | <b>0/1</b>          | <b>0/1</b>               |
| Opitutaceae bacterium TAV2 *                                   | <sup>4</sup> C- |                 |                  |                 |                 |                 |                     |                          |

Table 1: (cont) Sequences used in the study

| Taxon                                         | S4              | S14             | S18             | L28             | L31             | L32             | L33             | L36             |
|-----------------------------------------------|-----------------|-----------------|-----------------|-----------------|-----------------|-----------------|-----------------|-----------------|
| <i>Opitutus terrae</i> PB90-1                 | <sup>4</sup> C- | <sup>3</sup> C- | <sup>4</sup> C- | <sup>3</sup> C- | <sup>4</sup> C- | <sup>4</sup> C- | <sup>3</sup> C- | <sup>3</sup> C- |
| <b><i>Spartobacteria</i></b> (1)              | <b>0/1</b>      | <b>0/0</b>      |
| <i>Chthoniobacter flavus</i> Ellin428 *       | <sup>4</sup> C- |                 |                 |                 |                 |                 |                 |                 |
| <b>Unknown (class)</b> (1)                    | <b>0/1</b>      | <b>0/0</b>      |
| <i>Methylacidiphilum infernorum</i> V4 *      | <sup>4</sup> C- |                 |                 |                 |                 |                 |                 |                 |
| <b><i>Verrucomicrobiae</i></b> (3)            | <b>0/3</b>      | <b>0/0</b>      |
| <i>Akkermansia muciniphila</i> ATCC BAA-835 * | <sup>4</sup> C- |                 |                 |                 |                 |                 |                 |                 |
| <i>Verrucomicrobium spinosum</i> DSM 4136 *   | <sup>4</sup> C- |                 |                 |                 |                 |                 |                 |                 |
| <i>Bacterium</i> Ellin514 *                   | <sup>4</sup> C- |                 |                 |                 |                 |                 |                 |                 |

a) numbers in the parenthesis indicate the number of genomes in this level of taxonomy; b) pairs of numbers in bold indicate number of C+/C- genes detected, including all the paralogs; c) <sup>h</sup>C+ indicates a zinc binding motif with three cysteines and one histidine, similar for <sup>s</sup>C+; d) <sup>4</sup>C- indicates that the r-protein detected is missing four cysteines, <sup>3</sup>C- indicates that the r-protein is missing three cysteines, similar for <sup>2</sup>C- and <sup>1</sup>C-; e) organisms with an (\*) asterisk after their names are draft genomes, which are only used in the S4 analysis.
